# Supplementary material for: Quinine-thiourea catalyzed enantioselective hydrophosphonylation of trifluoromethyl 2(1H)-quinazolinones
Source: Royal Society of Chemistry journal article supplement (doi:10.1039/c2cc38097h), 2012-12-12

## ***Supporting Information***

### **Quinine-thiourea catalyzed enantioselective hydrophosphonylation of trifluoromethyl 2(1*H*)-quinazolinones**

Hexin Xie,<sup>a,b</sup> Aiguo Song,<sup>a</sup> Xinshuai Zhang,<sup>a</sup> Xiaobei Chen,<sup>a</sup> Hao Li,<sup>b</sup> Chunquan Sheng,<sup>c,\*</sup> and Wei Wang<sup>a,b,\*</sup>

<sup>a</sup> *Department of Chemistry & Chemical Biology, University of New Mexico, Albuquerque, New Mexico 87131-0001*

<sup>b</sup> *School of Pharmacy, East China University of Science & Technology, 130 Mei-Long Road, Shanghai, P. R. China*

<sup>c</sup> *Department of Medicinal Chemistry, School of Pharmacy, Second Military Medical University, Shanghai 200433, P. R. China*

## **Contents**

|                                                                               |         |
|-------------------------------------------------------------------------------|---------|
| General                                                                       | S2      |
| General procedure of hydrophosphonylation reactions                           | S2      |
| Compound characterization data for <b>3a-i</b>                                | S2-S5   |
| Original <sup>1</sup> H and <sup>13</sup> C spectra for compounds <b>3a-i</b> | S6-S15  |
| Chiral HPLC analysis trace for compound <b>3a-i</b>                           | S16-S25 |

**General Information:** Commercial reagents were used as received, unless otherwise stated. Merck 60 silica gel was used for chromatography, and Whatman silica gel plates with fluorescence F<sub>254</sub> were used for thin-layer chromatography (TLC) analysis. <sup>1</sup>H and <sup>13</sup>C NMR spectra were recorded on Bruker Avance 500, and tetramethylsilane (TMS) was used as a reference. Data for <sup>1</sup>H are reported as follows: chemical shift (ppm), and multiplicity (s = singlet, d = doublet, t = triplet, q = quartet, m = multiplet). Data for <sup>13</sup>C NMR are reported as ppm. Trifluoromethyl quinazolin-2(1H)-ones were prepared with reported method<sup>1</sup> and the other quinazolin-2(1H)-ones were prepared with Grignard reagents.<sup>2</sup>

### General procedure

To a mixture of quinazolin-2(1H)-one **1** (0.06 mmol) and catalyst (0.006 mmol) in solvent (0.5 mL) at rt was added dimethyl phosphite (0.12 mmol or 0.3 mmol). The resulting mixture was then stirred at rt until reaction completed. The pure product was obtained after purification by column chromatography on silica gel.

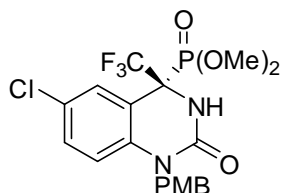

### (R)-6-Chloro-1-(4-methoxybenzyl)-4-(dimethoxyphosphoryl)-4-(trifluoromethyl)-3,4-dihydroquinazolin-2(1H)-one (**3a**)

The title compound was prepared according to the general procedure, as described above in 91% yield. <sup>1</sup>H NMR (500 MHz, CDCl<sub>3</sub>): δ 7.77 (s, 1H), 7.22 (d, *J* = 8.5 Hz, 1H), 7.15 (d, *J* = 8.5 Hz, 2H), 6.85 (d, *J* = 8.5 Hz, 2H), 6.80 (d, *J* = 8.5 Hz, 1H), 5.85 (s, 1H), 5.13 (d, *J* = 16.5 Hz, 1H), 5.05 (d, *J* = 16.5 Hz, 1H), 3.89 (d, *J* = 10.5 Hz, 3H), 3.77 (s, 3H), 3.73 (d, *J* = 10.5 Hz, 3H); <sup>13</sup>C NMR (125 MHz, CDCl<sub>3</sub>): δ 158.9, 151.1 (d, *J* = 6 Hz), 136.7 (d, *J* = 7 Hz), 130.9, 128.3, 127.8, 127.5, 116.4, 114.3, 113.0 (d, *J* = 6 Hz), 55.4 (d, *J* = 7 Hz), 55.2, 54.8 (d, *J* = 7 Hz), 45.5; HPLC (Chiralcel OJ-H, *i*-PrOH/hexane = 40/60, flow rate = 0.6 mL/min, λ = 254 nm): *t*<sub>minor</sub> = 12.07 min, *t*<sub>major</sub> = 20.20 min, ee = 89%; [α]<sub>D</sub><sup>22</sup> = - 30.0 (*c* = 2.0 in CHCl<sub>3</sub>).

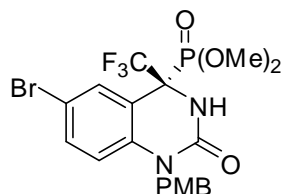

### (R)-6-Bromo-1-(4-methoxybenzyl)-4-(dimethoxyphosphoryl)-4-(trifluoromethyl)-3,4-dihydroquinazolin-2(1H)-one (**3b**)

The title compound was prepared according to the general procedure, as described above in 62% yield. <sup>1</sup>H NMR (500 MHz, CDCl<sub>3</sub>): δ 7.90 (s, 1H), 7.37 (d, *J* = 8.5 Hz, 1H), 7.14 (d, *J* = 8 Hz, 2H), 6.85 (d, *J* = 8 Hz, 2H), 6.74 (d, *J* = 8.5 Hz, 1H), 5.79 (s, 1H), 5.13 (d, *J* = 16 Hz, 1H), 5.04 (d, *J* = 16 Hz, 1H), 3.89 (d, *J* = 11 Hz, 3H), 3.77 (s, 3H), 3.73 (d, *J* = 11 Hz, 3H); <sup>13</sup>C NMR (125 MHz, CDCl<sub>3</sub>): δ 159.0, 151.0 (d, *J* = 6 Hz), 137.3, 133.9, 131.1, 127.7, 127.5, 116.8, 115.0, 114.3, 113.4, 113.4, 55.4 (d, *J* = 7 Hz), 55.3, 54.9 (d, *J* = 7 Hz), 45.5; HPLC (Chiralcel OJ-H, *i*-PrOH/hexane = 40/60, flow rate = 0.6 mL/min, λ = 254 nm): *t*<sub>minor</sub> = 11.62 min, *t*<sub>major</sub> = 19.45 min, ee = 90%; [α]<sub>D</sub><sup>22</sup> = - 35.6 (*c* = 2.0 in CHCl<sub>3</sub>).

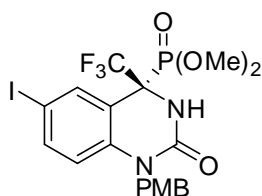

**(R)-6-Iodo-1-(4-methoxybenzyl)-4-(dimethoxyphosphoryl)-4-(trifluoromethyl)-3,4-dihydroquinazolin-2(1H)-one (3c)**

The title compound was prepared according to the general procedure, as described above in 62% yield.  $^1\text{H}$  NMR (500 MHz,  $\text{CDCl}_3$ ):  $\delta$  8.05 (s, 1H), 7.55 (d,  $J = 8.5$  Hz, 1H), 7.14 (d,  $J = 8.5$  Hz, 2H), 6.84 (d,  $J = 8.5$  Hz, 2H), 6.62 (d,  $J = 8.5$  Hz, 1H), 5.85 (s, 1H), 5.12 (d,  $J = 16.5$  Hz, 1H), 5.03 (d,  $J = 16.5$  Hz, 1H), 3.88 (d,  $J = 10.5$  Hz, 3H), 3.77 (s, 3H), 3.73 (d,  $J = 10.5$  Hz, 3H);  $^{13}\text{C}$  NMR (125 MHz,  $\text{CDCl}_3$ ):  $\delta$  159.0, 151.0 (d,  $J = 6$  Hz), 139.8, 137.9 (d,  $J = 7$  Hz), 136.8, 127.7, 127.5, 117.1, 114.3, 113.7, 84.7, 55.4 (d,  $J = 7$  Hz), 55.3, 54.8 (d,  $J = 7$  Hz), 45.4; HPLC (Chiralcel OJ-H, *i*-PrOH/hexane = 40/60, flow rate = 0.6 mL/min,  $\lambda = 254$  nm):  $t_{\text{minor}} = 12.84$  min,  $t_{\text{major}} = 21.45$  min, ee = 87%;  $[\alpha]_{\text{D}}^{22} = -37.6$  ( $c = 2.0$  in  $\text{CHCl}_3$ ).

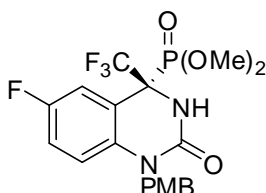

**(R)-6-Fluoro-1-(4-methoxybenzyl)-4-(dimethoxyphosphoryl)-4-(trifluoromethyl)-3,4-dihydroquinazolin-2(1H)-one (3d)**

The title compound was prepared according to the general procedure, as described above in 75% yield.  $^1\text{H}$  NMR (500 MHz,  $\text{CDCl}_3$ ):  $\delta$  7.57 (d,  $J = 9$  Hz, 1H), 7.16 (d,  $J = 8$  Hz, 2H), 7.00-6.97 (m, 1H), 6.86-6.81 (m, 3H), 5.87 (s, 1H), 5.13 (d,  $J = 16.5$  Hz, 1H), 5.06 (d,  $J = 16.5$  Hz, 1H), 3.89 (d,  $J = 10.5$  Hz, 3H), 3.77 (s, 3H), 3.71 (d,  $J = 10.5$  Hz, 3H);  $^{13}\text{C}$  NMR (125 MHz,  $\text{CDCl}_3$ ):  $\delta$  158.9, 158.6, 156.6, 151.2, 134.4, 127.9, 127.5, 117.9, 117.7, 116.5, 116.4, 115.8, 115.6, 114.3, 112.8, 55.3 (d,  $J = 7$  Hz), 55.2, 54.8 (d,  $J = 7$  Hz), 45.6; HPLC (Chiralcel OJ-H, *i*-PrOH/hexane = 40/60, flow rate = 0.6 mL/min,  $\lambda = 254$  nm):  $t_{\text{minor}} = 11.69$  min,  $t_{\text{major}} = 16.47$  min, ee = 92%;  $[\alpha]_{\text{D}}^{22} = -3.5$  ( $c = 2.0$  in  $\text{CHCl}_3$ ).

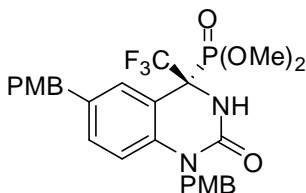

**(R)-1,6-bis(4-Methoxybenzyl)-4-(dimethoxyphosphoryl)-4-(trifluoromethyl)-3,4-dihydroquinazolin-2(1H)-one (3e)**

The title compound was prepared according to the general procedure, as described above in 85% yield.  $^1\text{H}$  NMR (500 MHz,  $\text{CDCl}_3$ ):  $\delta$  7.65 (s, 1H), 7.15 (d,  $J = 8.5$  Hz, 2H), 7.06-7.03 (m, 3H), 6.84-6.76 (m, 5H), 5.78 (s, 1H), 5.11-5.02 (m, 2H), 3.85-3.82 (m, 5H), 3.76 (s, 6H), 3.50 (d,  $J = 10.5$  Hz, 3H);  $^{13}\text{C}$  NMR (125 MHz,  $\text{CDCl}_3$ ):  $\delta$  158.8, 158.1, 151.4, 136.1 (d,  $J = 7$  Hz), 135.9, 132.5, 131.0, 129.7, 128.8, 128.4, 127.6, 115.2, 114.2, 113.9, 111.2 (d,  $J = 6$  Hz), 55.3, 55.2,

54.5 (d,  $J = 7$  Hz), 45.4, 40.1; HPLC (ee was determined with the corresponding deprotection (PMB on the N) product. Chiralcel OJ-H, *i*-PrOH/hexane = 30/70, flow rate = 0.6 mL/min,  $\lambda = 254$  nm):  $t_{\text{minor}} = 14.47$  min,  $t_{\text{major}} = 18.01$  min, ee = 93%;  $[\alpha]_{\text{D}}^{22} = -9.9$  ( $c = 1.0$  in  $\text{CHCl}_3$ ).

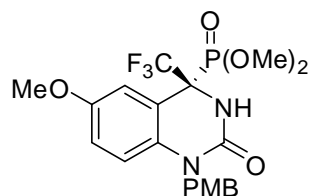

**(R)-6-Methoxy-1-(4-methoxybenzyl)-4-(dimethoxyphosphoryl)-4-(trifluoromethyl)-3,4-dihydroquinazolin-2(1H)-one (3f)**

The title compound was prepared according to the general procedure, as described above in 84% yield.  $^1\text{H}$  NMR (500 MHz,  $\text{CDCl}_3$ ):  $\delta$  7.40 (s, 1H), 7.16 (d,  $J = 9$  Hz, 2H), 6.85-6.78 (m, 4H), 5.83 (s, 1H), 5.11 (d,  $J = 16.5$  Hz, 1H), 5.05 (d,  $J = 16.5$  Hz, 1H), 3.88 (d,  $J = 10.5$  Hz, 3H), 3.77 (s, 3H), 3.76 (s, 3H), 3.66 (d,  $J = 10.5$  Hz, 3H);  $^{13}\text{C}$  NMR (125 MHz,  $\text{CDCl}_3$ ):  $\delta$  158.8, 154.6, 151.3 (d,  $J = 6$  Hz), 131.5 (d,  $J = 7$  Hz), 128.4, 127.5, 116.4, 116.2, 114.2, 114.0, 112.2 (d,  $J = 6$  Hz), 55.6, 55.3 (d,  $J = 7$  Hz), 55.2, 54.6 (d,  $J = 7$  Hz), 45.4; HPLC (Chiralcel OJ-H, *i*-PrOH/hexane = 40/60, flow rate = 0.6 mL/min,  $\lambda = 254$  nm):  $t_{\text{minor}} = 13.18$  min,  $t_{\text{major}} = 24.26$  min, ee = 93%;  $[\alpha]_{\text{D}}^{22} = -34.0$  ( $c = 2.0$  in  $\text{CHCl}_3$ ).

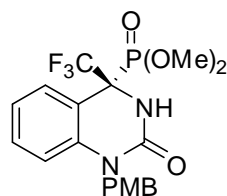

**(R)-1-(4-Methoxybenzyl)-4-(dimethoxyphosphoryl)-4-(trifluoromethyl)-3,4-dihydroquinazolin-2(1H)-one (3g)**

The title compound was prepared according to the general procedure, as described above in 88% yield.  $^1\text{H}$  NMR (500 MHz,  $\text{CDCl}_3$ ):  $\delta$  7.83 (d,  $J = 7.5$  Hz, 1H), 7.27 (t,  $J = 7.5$  Hz, 1H), 7.18 (d,  $J = 8$  Hz, 2H), 7.05 (t,  $J = 7.5$  Hz, 1H), 6.88 (d,  $J = 8$  Hz, 1H), 6.85 (d,  $J = 8$  Hz, 2H), 5.85 (s, 1H), 5.18-5.05 (m, 2H), 3.88 (d,  $J = 10.5$  Hz, 3H), 3.77 (s, 3H), 3.63 (d,  $J = 10.5$  Hz, 3H);  $^{13}\text{C}$  NMR (125 MHz,  $\text{CDCl}_3$ ):  $\delta$  158.8, 151.4 (d,  $J = 6$  Hz), 138.0 (d,  $J = 7$  Hz), 130.9, 128.6, 128.3, 127.5, 122.3, 115.2, 114.2, 111.2 (d,  $J = 6$  Hz), 55.3 (d,  $J = 7$  Hz), 55.2, 54.5 (d,  $J = 7$  Hz), 45.3; HPLC (Chiralcel OJ-H, *i*-PrOH/hexane = 40/60, flow rate = 0.6 mL/min,  $\lambda = 254$  nm):  $t_{\text{minor}} = 11.05$  min,  $t_{\text{major}} = 16.80$  min, ee = 93%;  $[\alpha]_{\text{D}}^{22} = -15.9$  ( $c = 2.0$  in  $\text{CHCl}_3$ ).

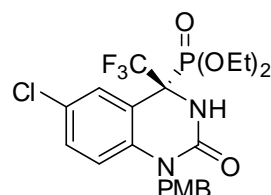

**(R)-6-Chloro-1-(4-methoxybenzyl)-4-(diethoxyphosphoryl)-4-(trifluoromethyl)-3,4-dihydroquinazolin-2(1H)-one (3h)**

The title compound was prepared according to the general procedure, as described above in 84% yield.  $^1\text{H}$  NMR (500 MHz,  $\text{CDCl}_3$ ):  $\delta$  7.80 (s, 1H), 7.21 (d,  $J = 9$  Hz, 1H), 7.14 (d,  $J = 8.5$  Hz,

2H), 6.84 (d,  $J = 8.5$  Hz, 2H), 6.78 (d,  $J = 9$  Hz, 1H), 5.84 (s, 1H), 5.12 (d,  $J = 16$  Hz, 1H), 5.05 (d,  $J = 16$  Hz, 1H), 4.31-4.14 (m, 3H), 4.04-3.96 (m, 1H), 3.77 (s, 3H), 1.34 (t,  $J = 7$  Hz, 3H), 1.20 (t,  $J = 7$  Hz, 3H);  $^{13}\text{C}$  NMR (125 MHz,  $\text{CDCl}_3$ ):  $\delta$  158.9, 151.1, 136.8 (d,  $J = 6$  Hz), 130.7, 128.4, 127.8, 127.7, 127.5, 116.3, 114.3, 113.3, 65.3 (d,  $J = 7$  Hz), 64.8 (d,  $J = 7$  Hz), 55.2, 45.5, 16.3 (d,  $J = 5$  Hz), 16.2 (d,  $J = 5$  Hz); HPLC (Chiralcel OJ-H, *i*-PrOH/hexane = 40/60, flow rate = 0.6 mL/min,  $\lambda = 254$  nm):  $t_{\text{minor}} = 8.34$  min,  $t_{\text{major}} = 13.32$  min, ee = 88%;  $[\alpha]_{\text{D}}^{22} = -30.0$  ( $c = 2.0$  in  $\text{CHCl}_3$ ).

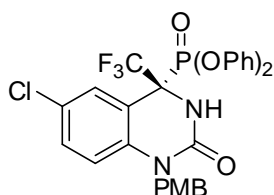

**(R)-6-Chloro-1-(4-methoxybenzyl)-4-(diphenoxyphosphoryl)-4-(trifluoromethyl)-3,4-dihydroquinazolin-2(1H)-one (3j)**

The title compound was prepared according to the general procedure, as described above in 97% yield.  $^1\text{H}$  NMR (500 MHz,  $\text{CDCl}_3$ ):  $\delta$  7.86 (s, 1H), 7.30 (d,  $J = 8$  Hz, 2H), 7.22-7.18 (m, 4H), 7.12-7.11 (m, 5H), 6.88 (d,  $J = 8$  Hz, 2H), 6.80-6.77 (m, 3H), 6.37 (s, 1H), 5.10-5.02 (m, 2H), 3.75 (s, 3H);  $^{13}\text{C}$  NMR (125 MHz,  $\text{CDCl}_3$ ):  $\delta$  158.9, 150.9 (d,  $J = 6$  Hz), 150.1, 150.0, 149.7, 149.6, 136.9 (d,  $J = 7$  Hz), 131.1, 130.0, 129.8, 128.7, 128.0, 127.6, 127.5, 126.0, 125.9, 120.3, 120.3, 120.0, 119.9, 116.5, 114.3, 112.1 (d,  $J = 6$  Hz), 55.2, 45.7; HPLC (ee was determined with the corresponding deprotection (PMB) product. Chiralpak AS-H, *i*-PrOH/hexane = 40/60, flow rate = 0.6 mL/min,  $\lambda = 254$  nm):  $t_{\text{minor}} = 10.28$  min,  $t_{\text{major}} = 25.09$  min, ee = 91%;  $[\alpha]_{\text{D}}^{22} = -32.8$  ( $c = 2.0$  in  $\text{CHCl}_3$ ).

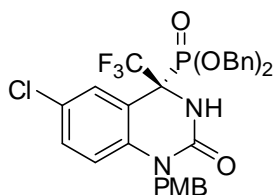

**(R)-6-Chloro-1-(4-methoxybenzyl)-4-(dibenzoyloxyphosphoryl)-4-(trifluoromethyl)-3,4-dihydroquinazolin-2(1H)-one (3j)**

The title compound was prepared according to the general procedure, as described above in 84% yield.  $^1\text{H}$  NMR (500 MHz,  $\text{CDCl}_3$ ):  $\delta$  7.80 (s, 1H), 7.35-7.24 (m, 8H), 7.16-7.10 (m, 3H), 7.06 (d,  $J = 8.5$  Hz, 2H), 6.78 (d,  $J = 8.5$  Hz, 2H), 6.64 (d,  $J = 9$  Hz, 1H), 5.86 (s, 1H), 5.16-4.76 (m, 6H), 3.75 (s, 3H);  $^{13}\text{C}$  NMR (125 MHz,  $\text{CDCl}_3$ ):  $\delta$  158.8, 150.9 (d,  $J = 6$  Hz), 136.7 (d,  $J = 7$  Hz), 134.8, 134.8, 130.7, 129.0, 128.8, 128.7, 128.6, 128.4, 127.8, 127.7, 127.4, 116.3, 114.3, 113.0 (d,  $J = 6$  Hz), 70.2, 70.1, 70.1, 55.2, 45.4; HPLC (Chiralcel OD-H, *i*-PrOH/hexane = 30/70, flow rate = 0.7 mL/min,  $\lambda = 254$  nm):  $t_{\text{minor}} = 15.11$  min,  $t_{\text{major}} = 17.86$  min, ee = 81%;  $[\alpha]_{\text{D}}^{22} = -26.2$  ( $c = 2.0$  in  $\text{CHCl}_3$ ).

**References.**

1. Magnus, N. A.; Confalone, P. N.; Storace, L.; Patel, M.; Wood, C. C.; Davis, W. P.; Parsons, Jr. R. L.; *J. Org. Chem.* **2003**, 68, 754.
2. Bergman, J.; Brynolf, A.; Elman, B.; Vuorinen, E. *Tetrahedron*. **1986**, 42, 3697.

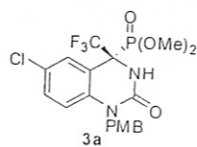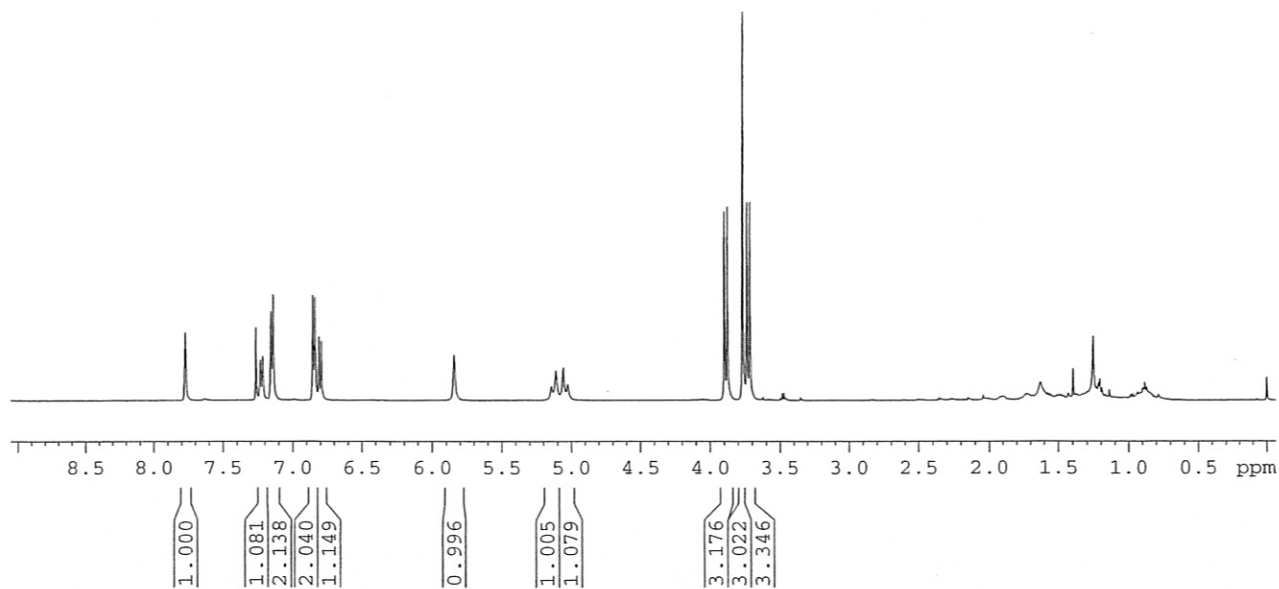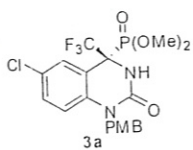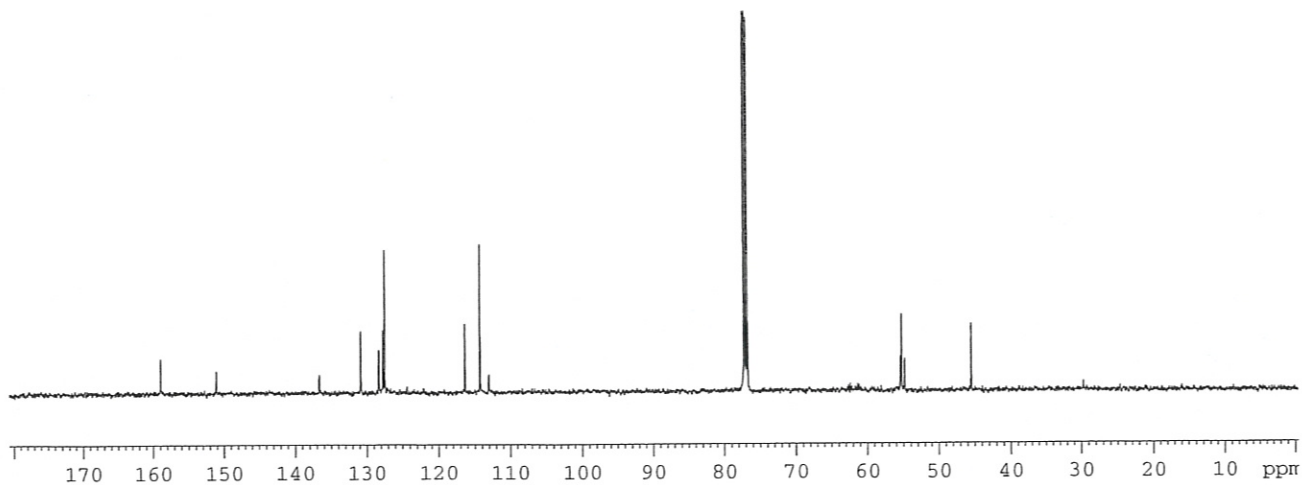

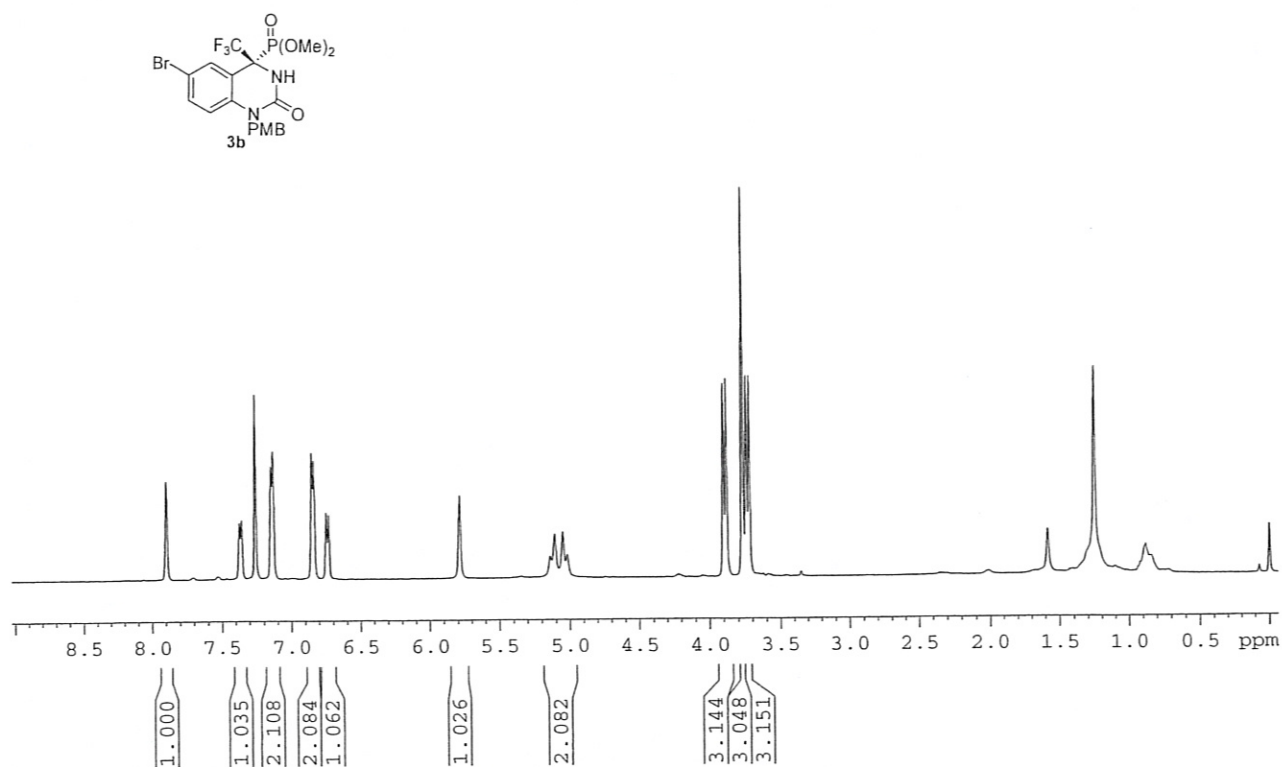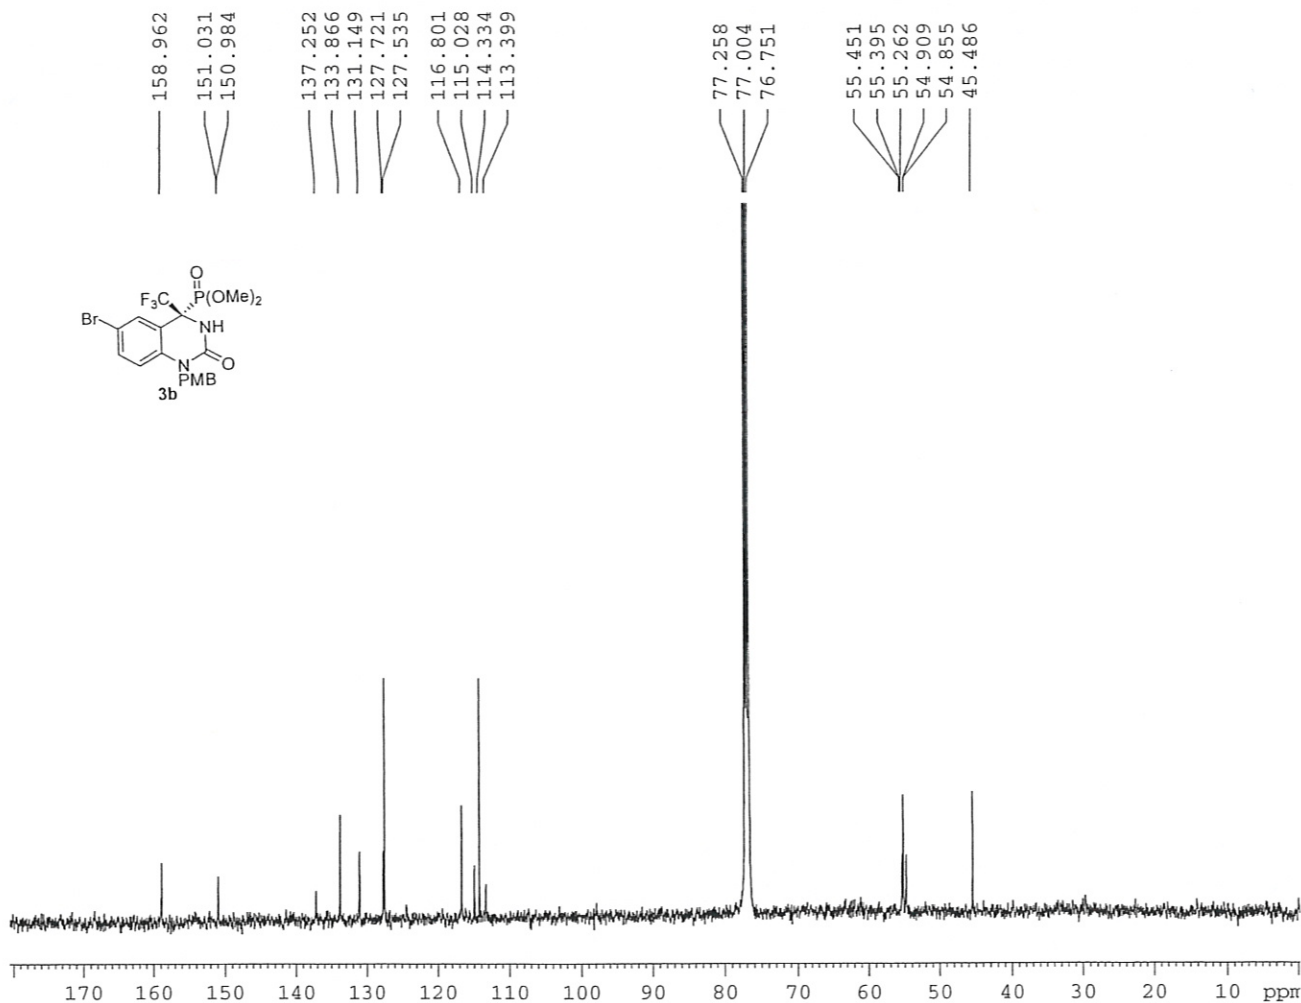

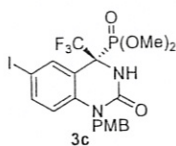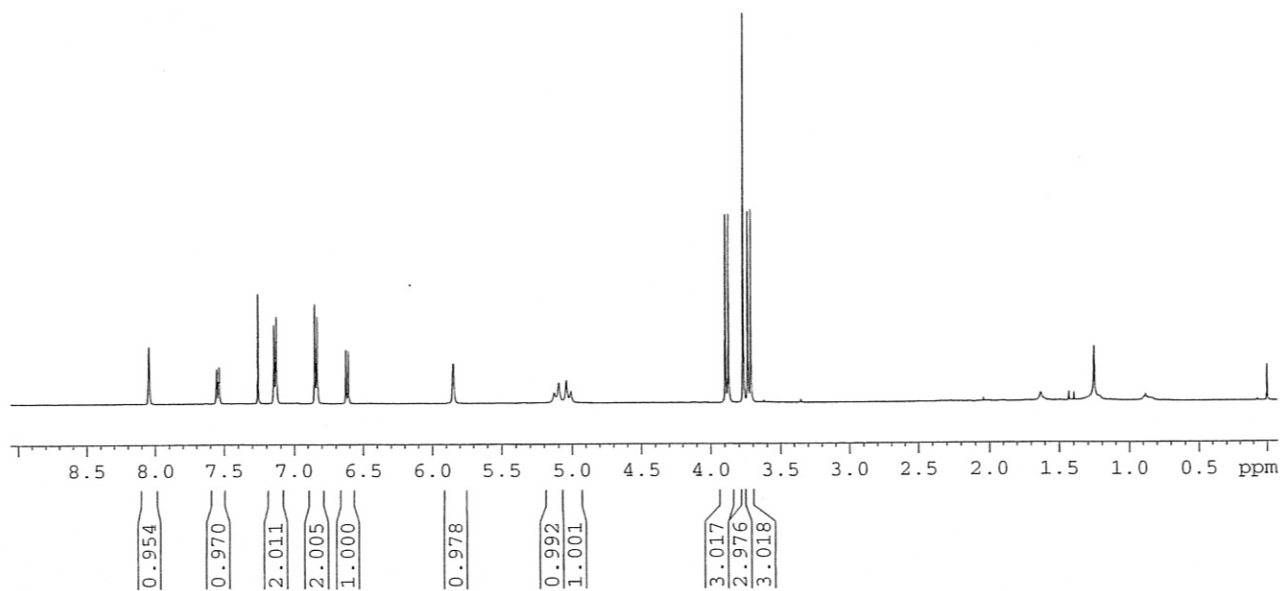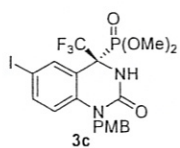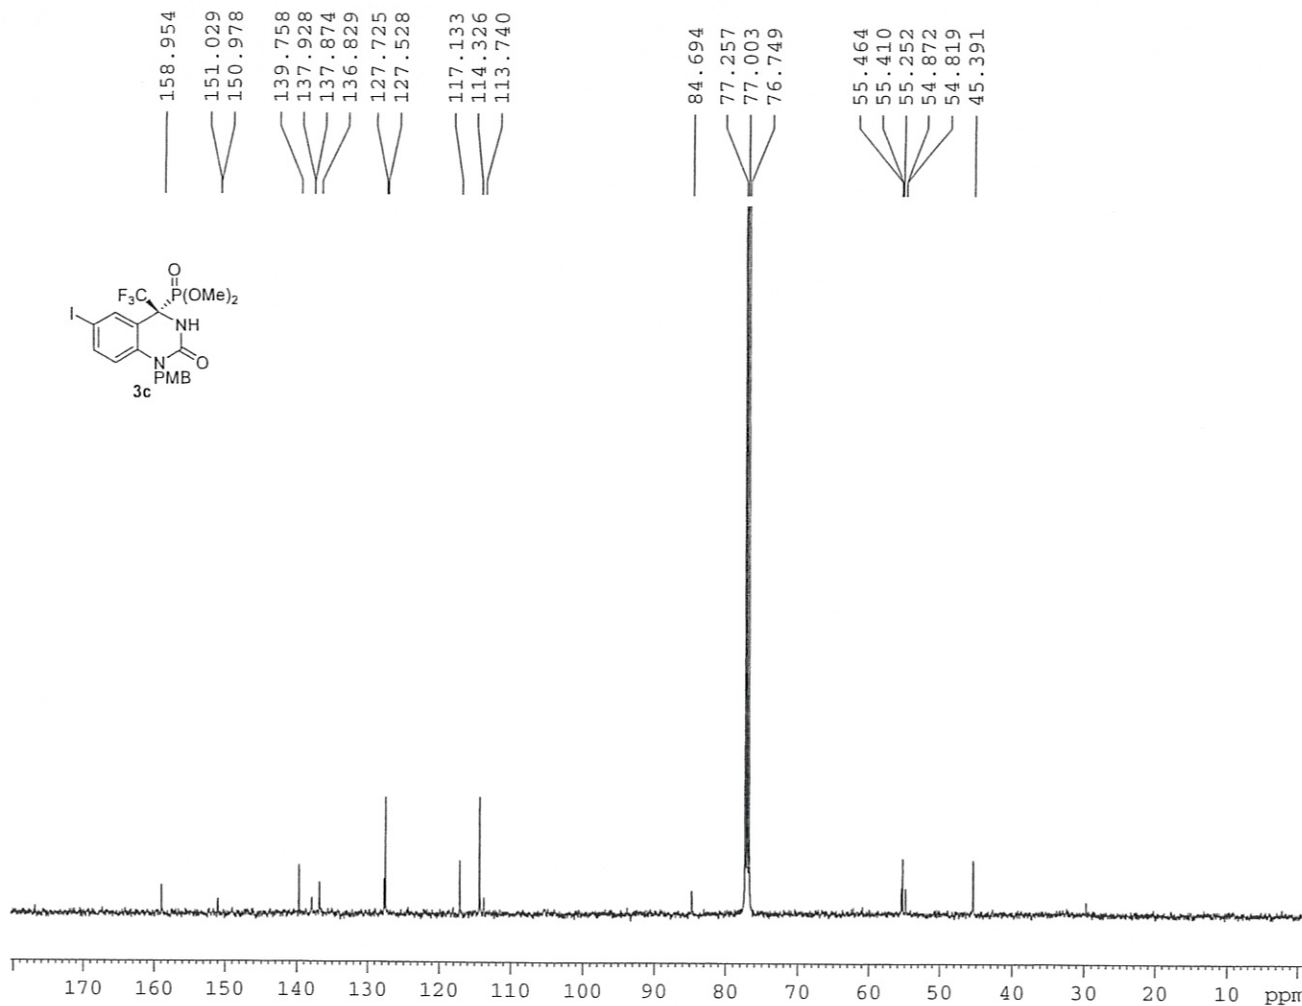

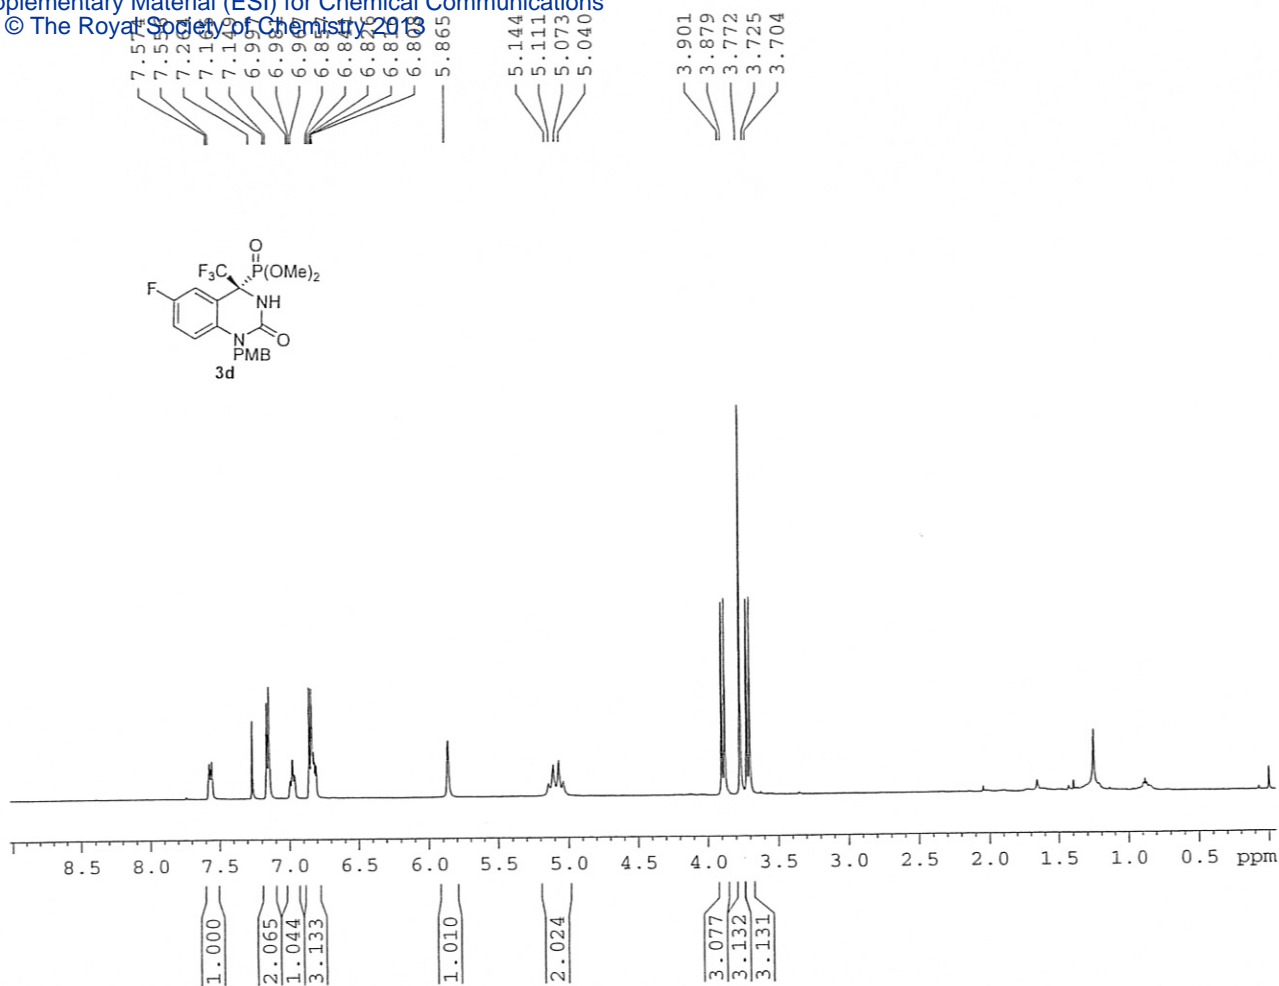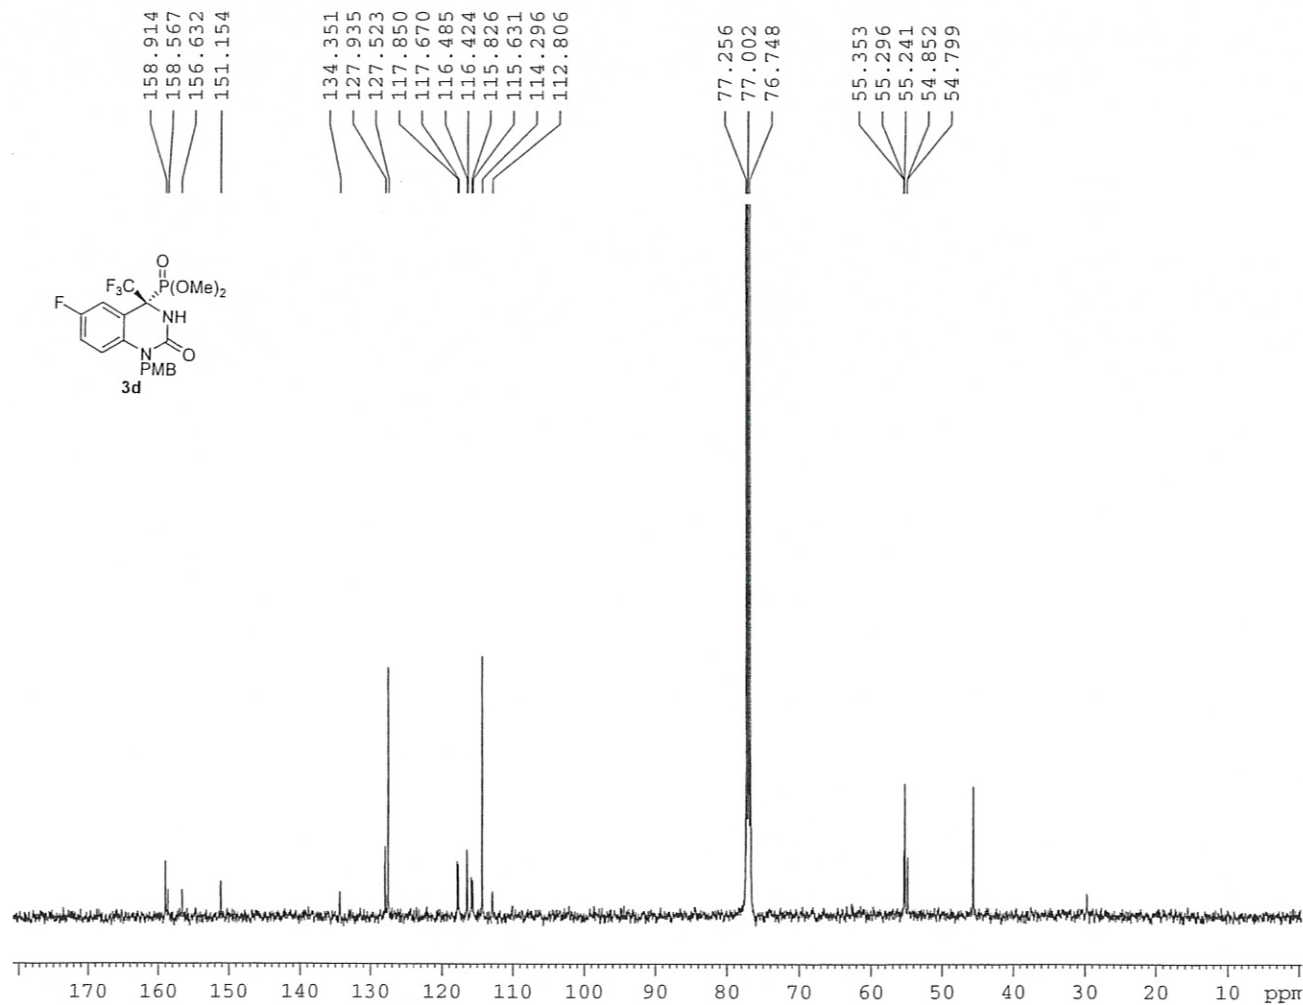

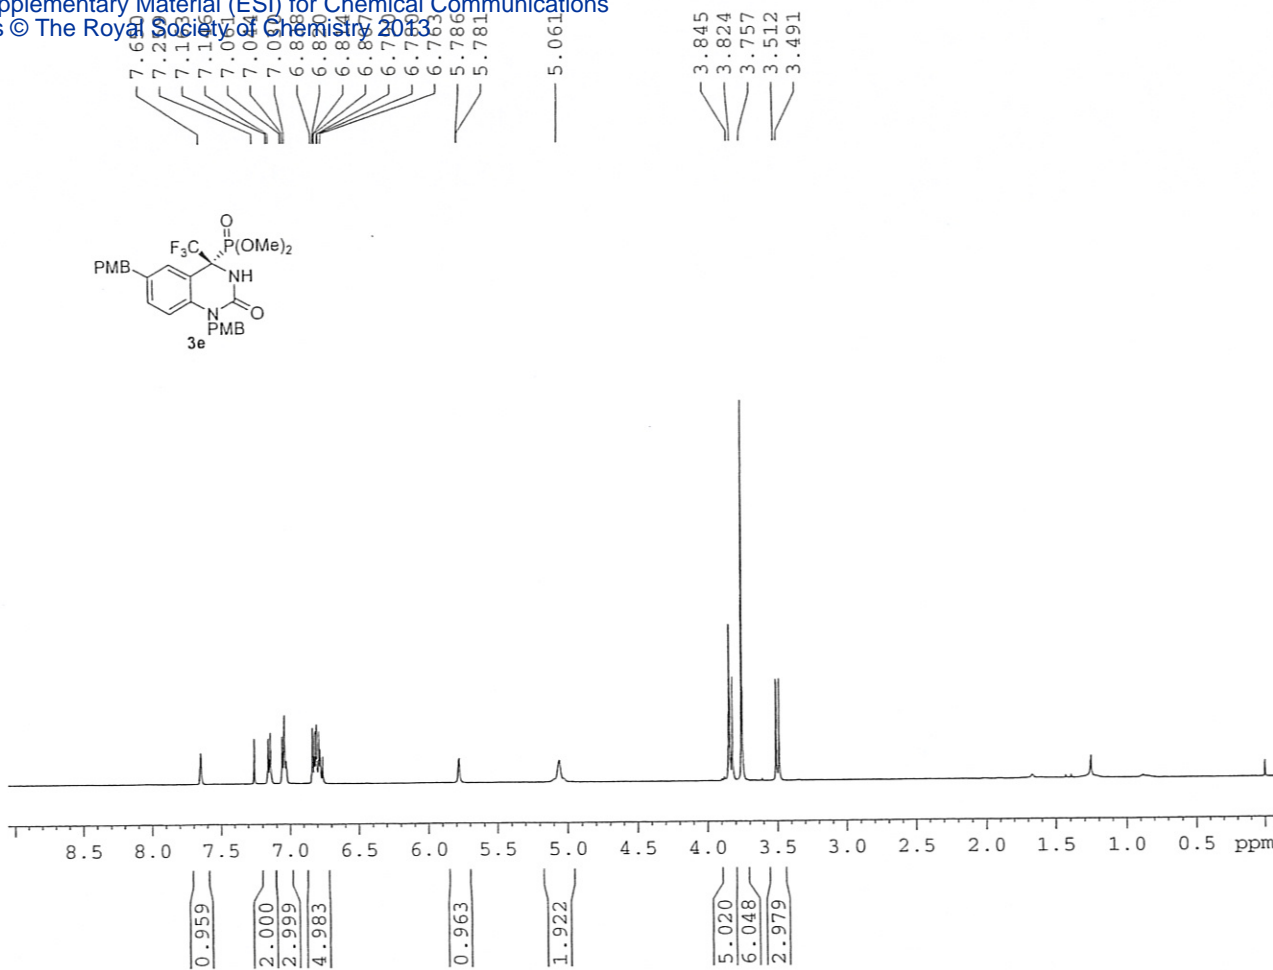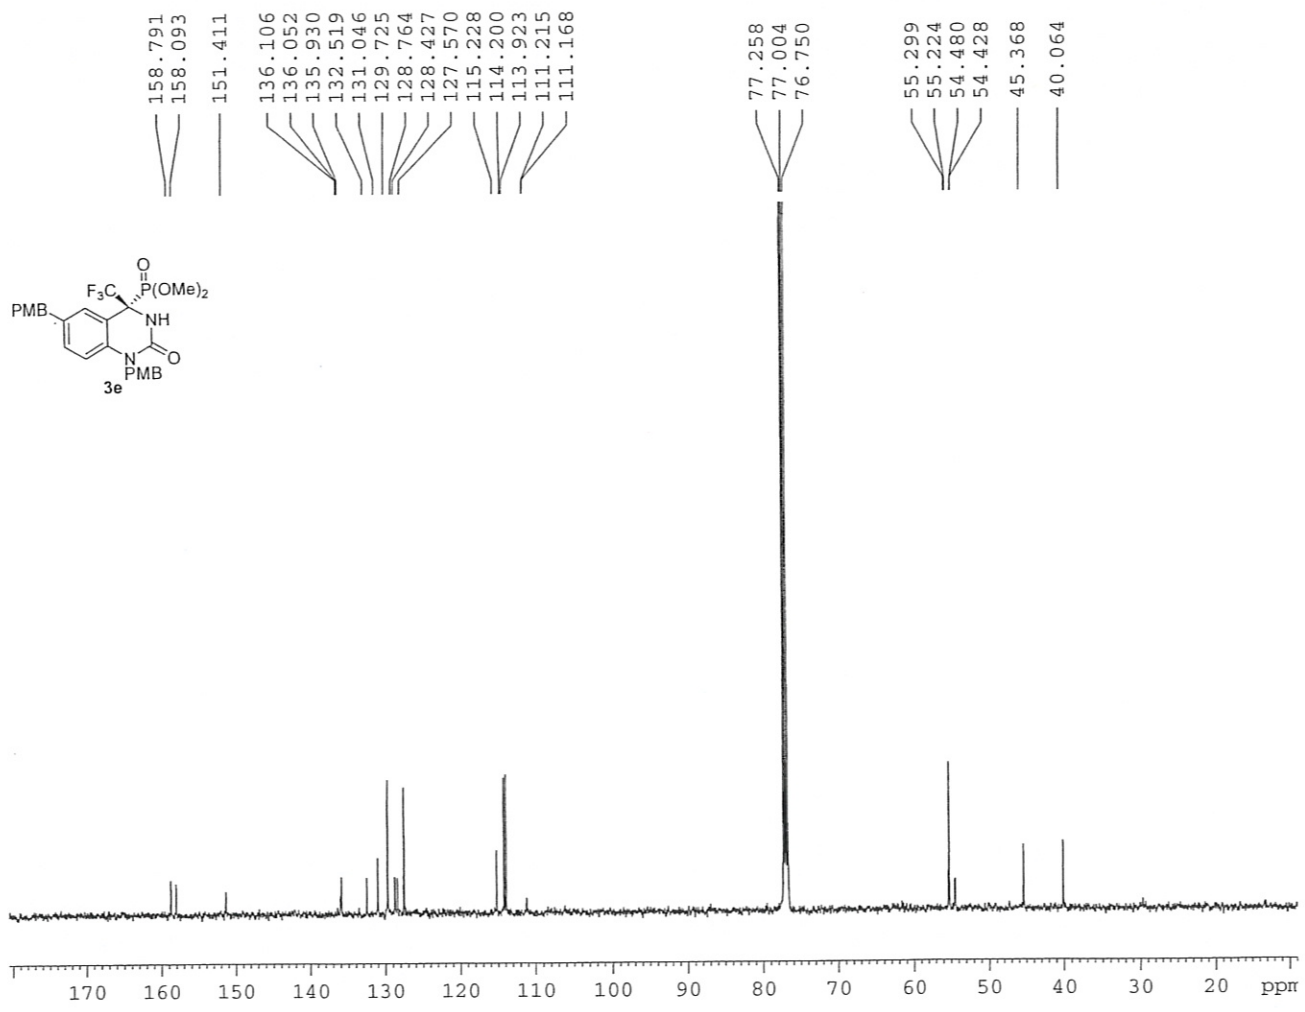

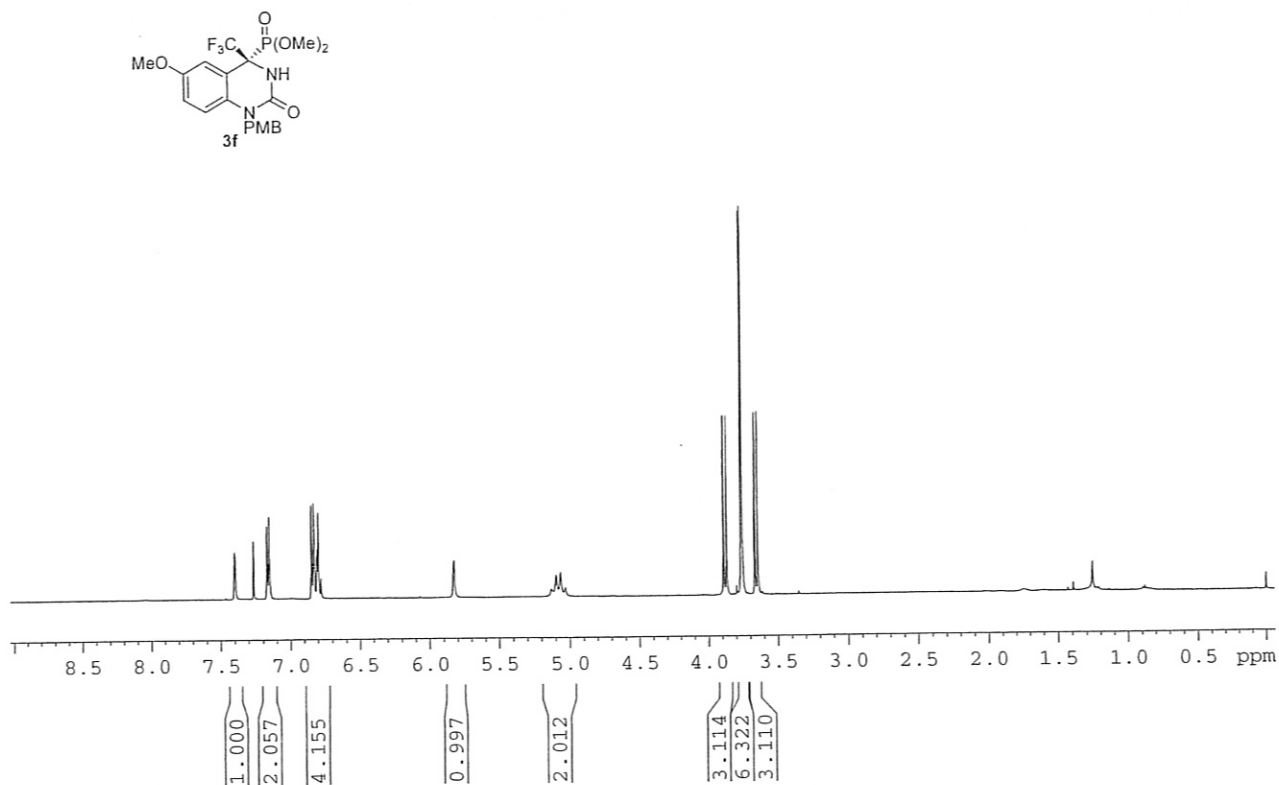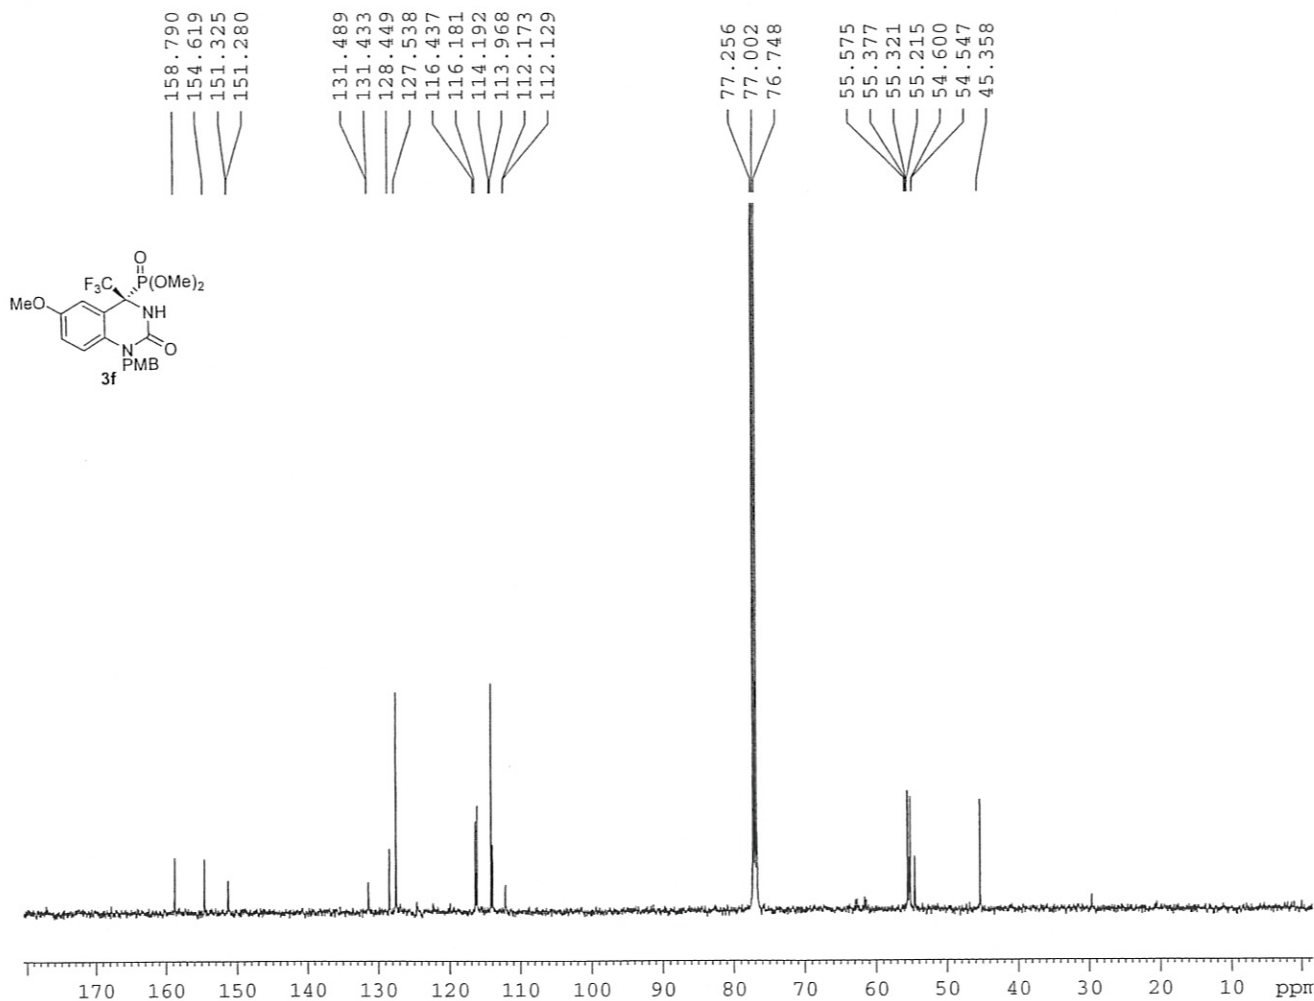

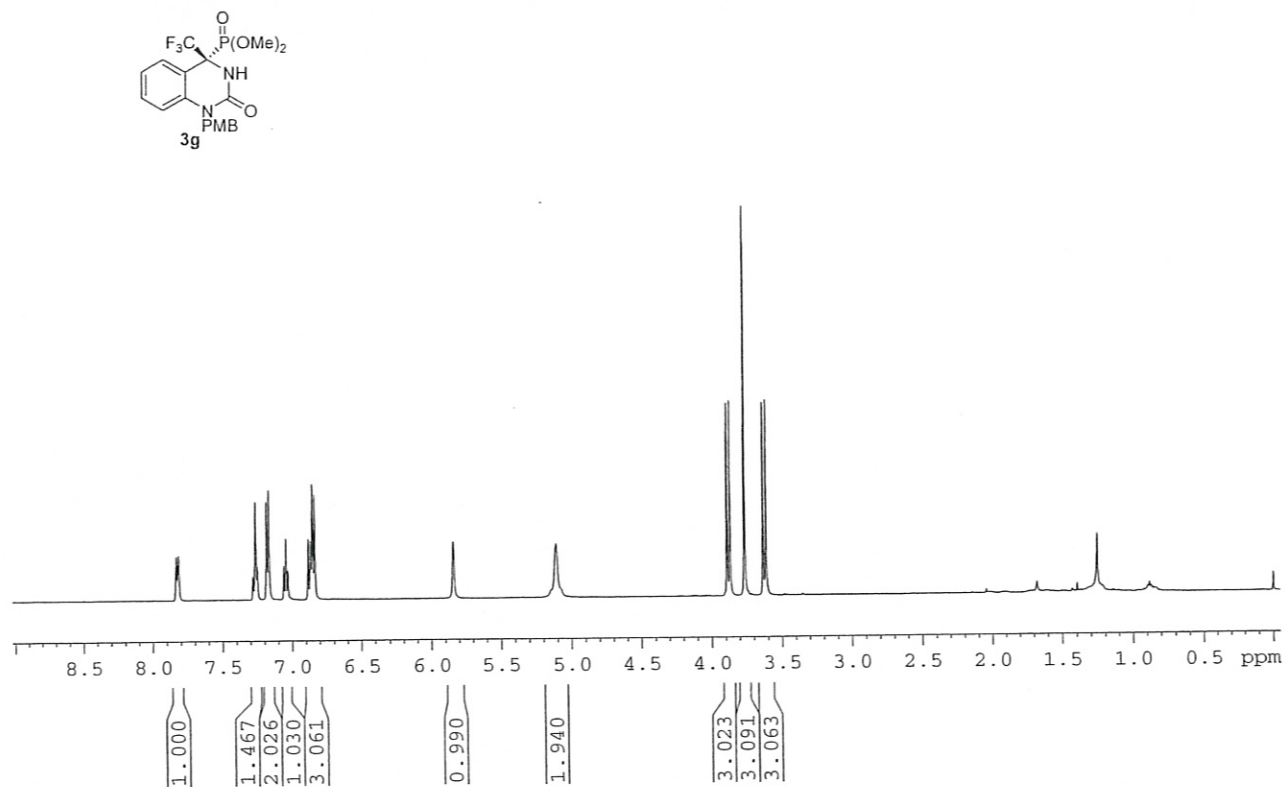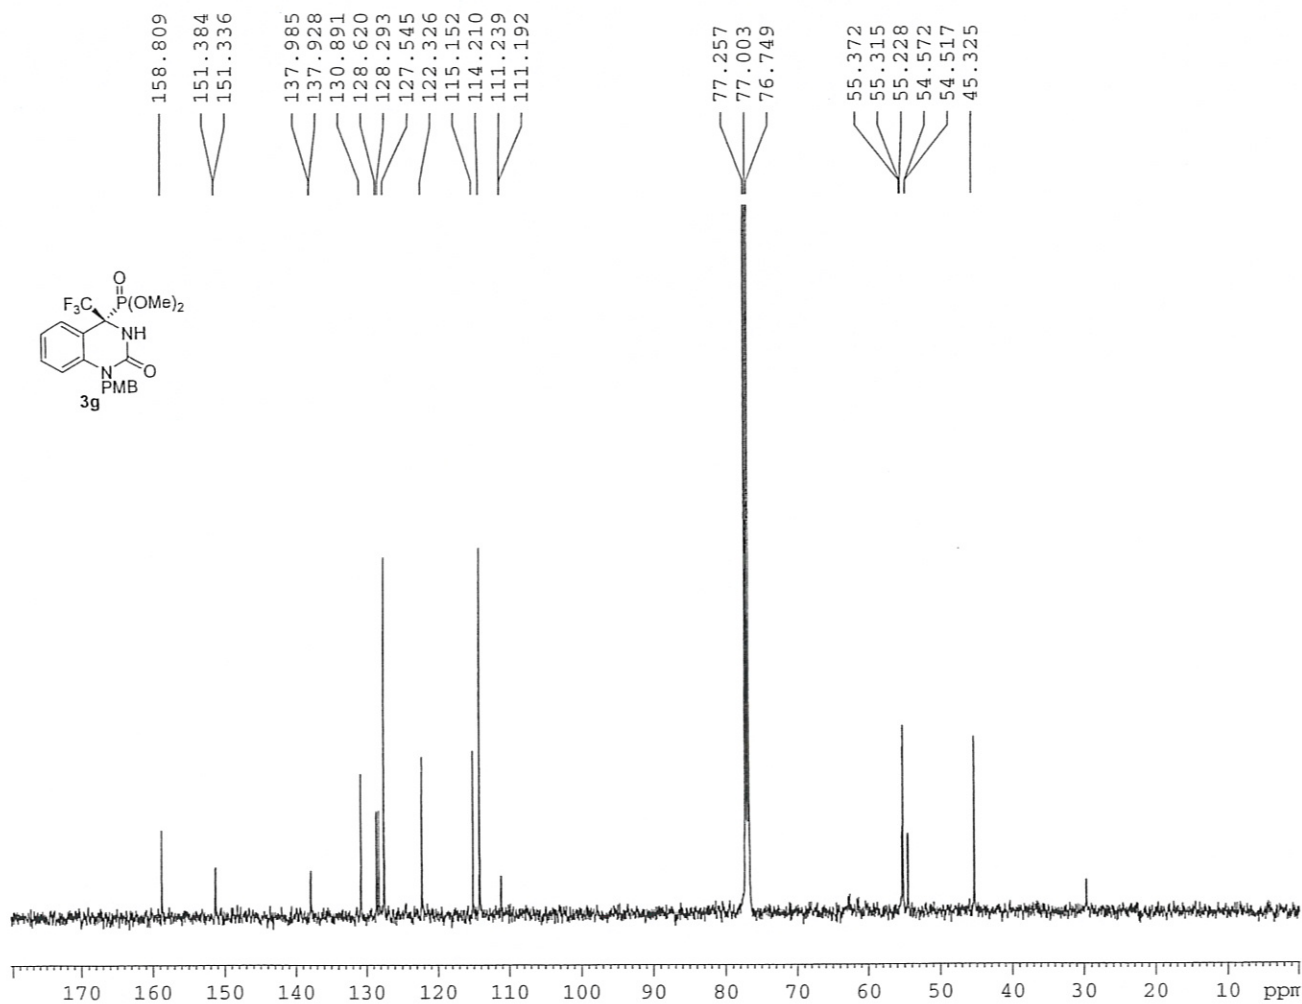

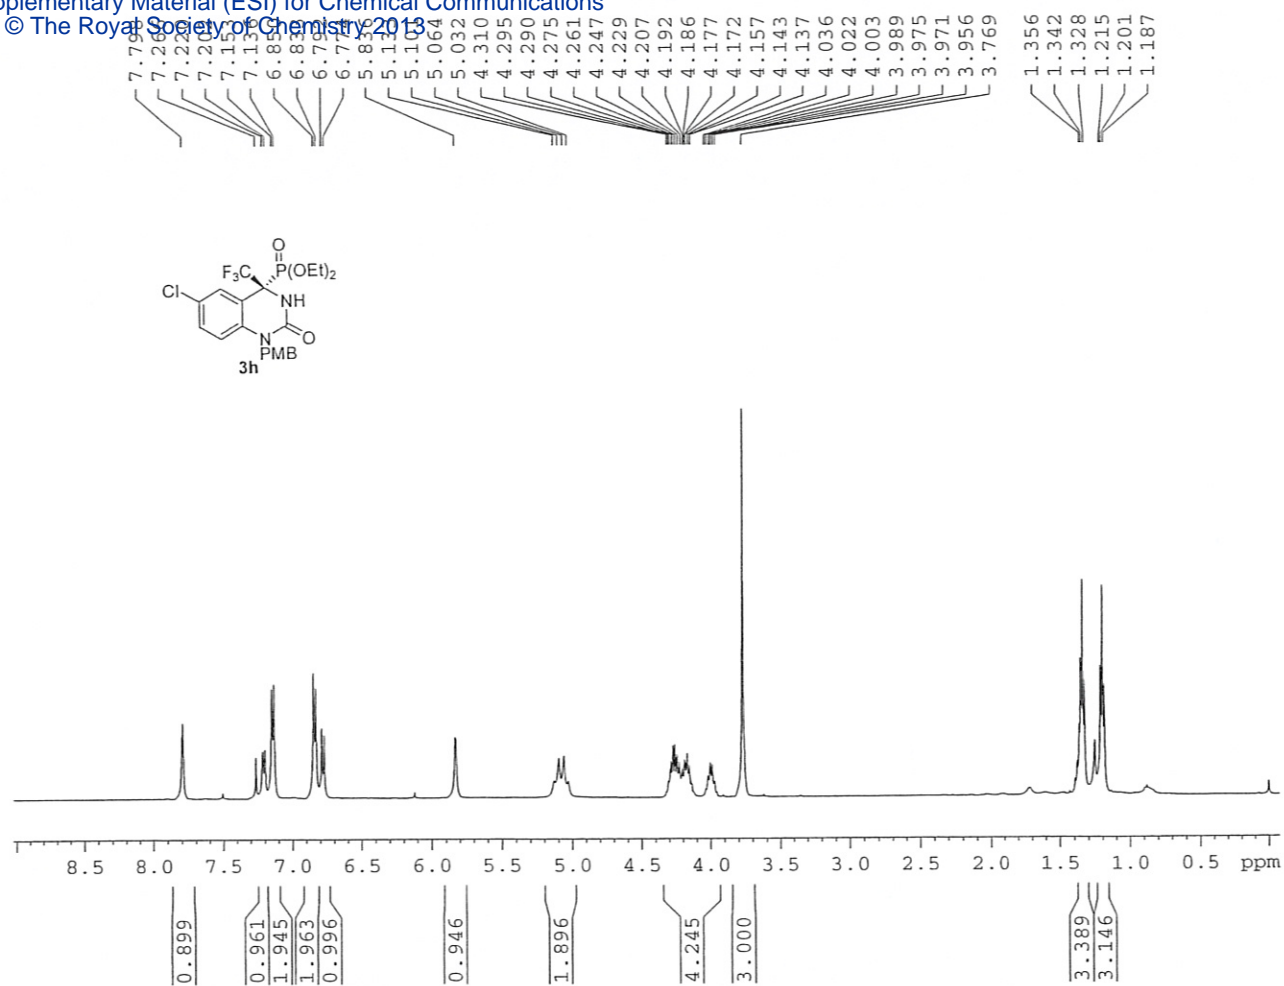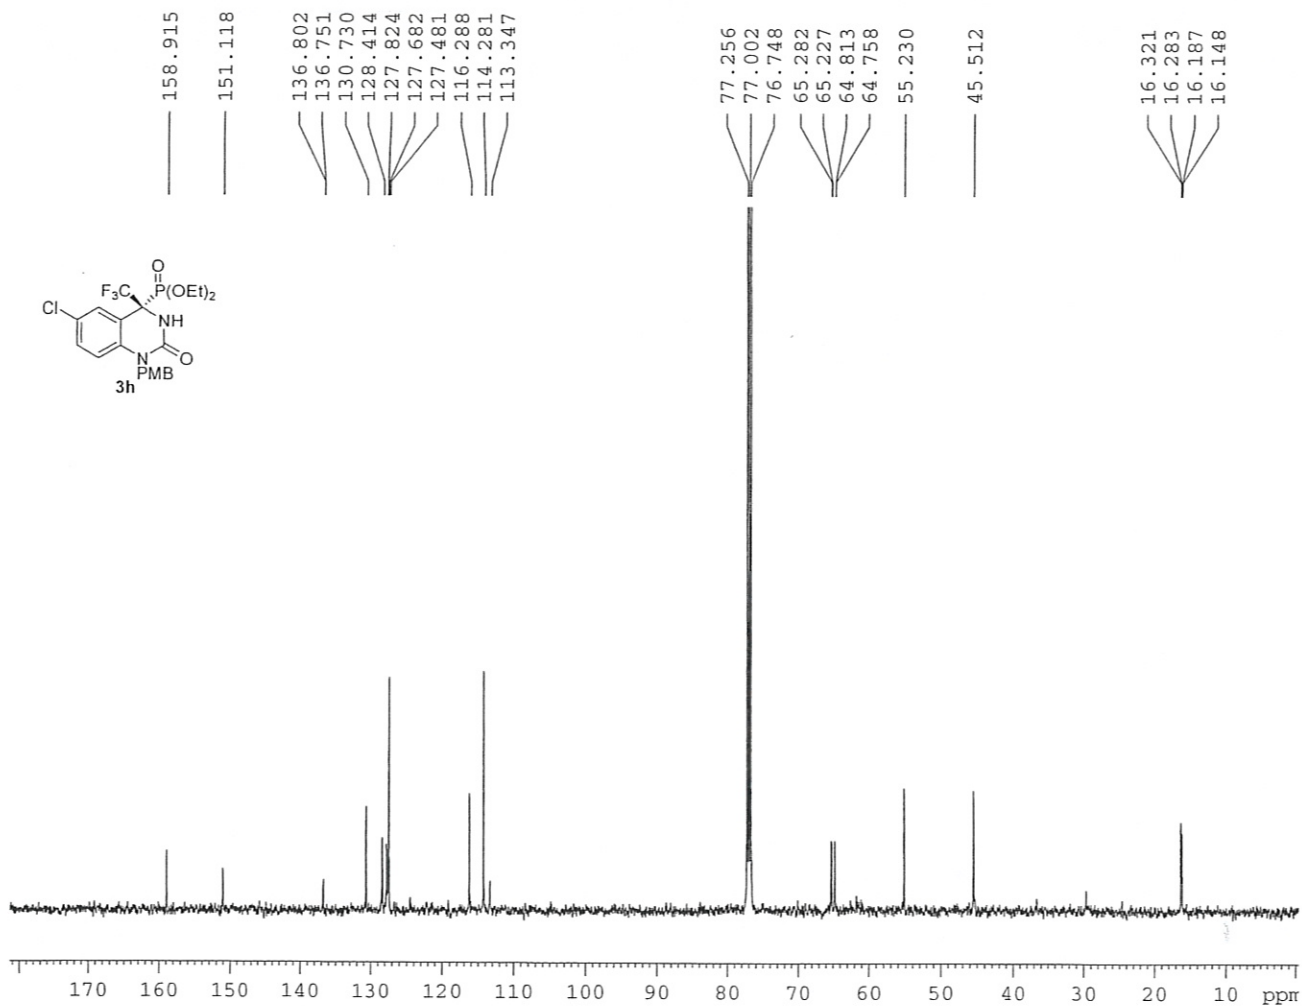

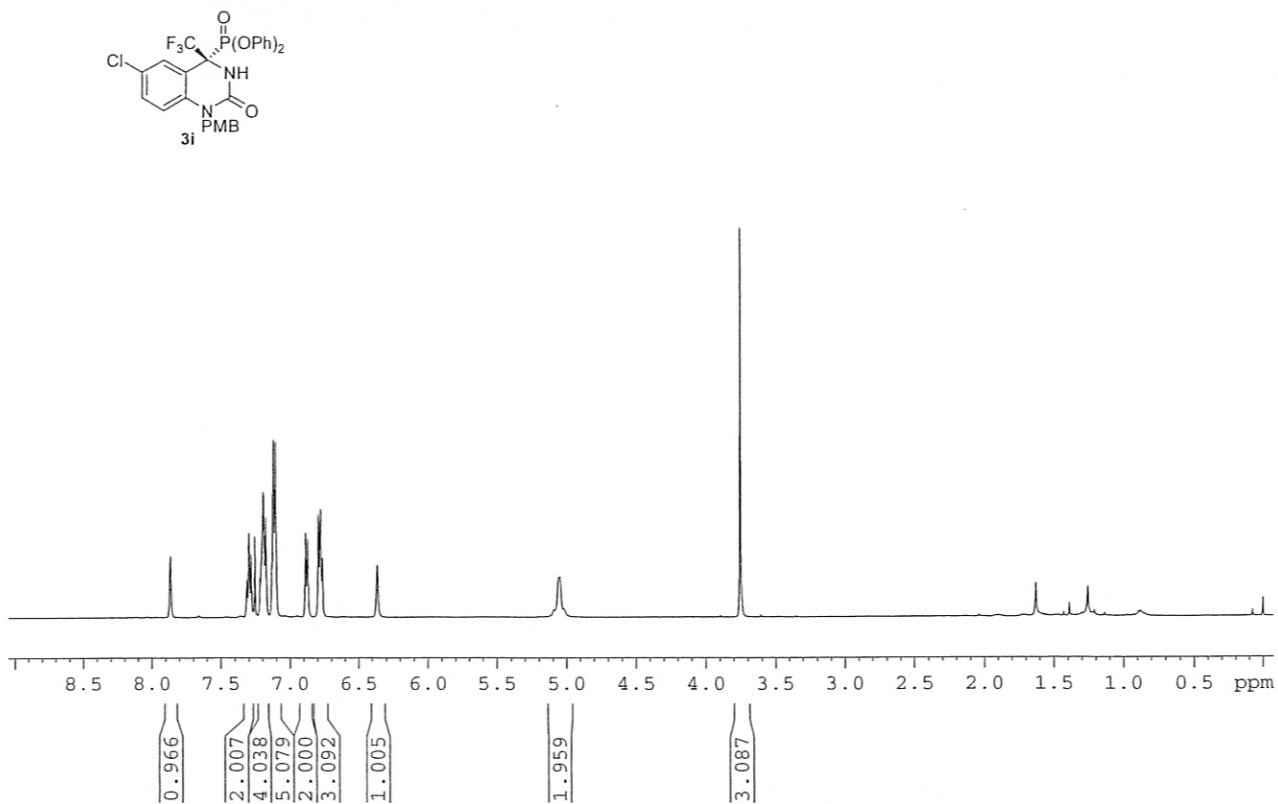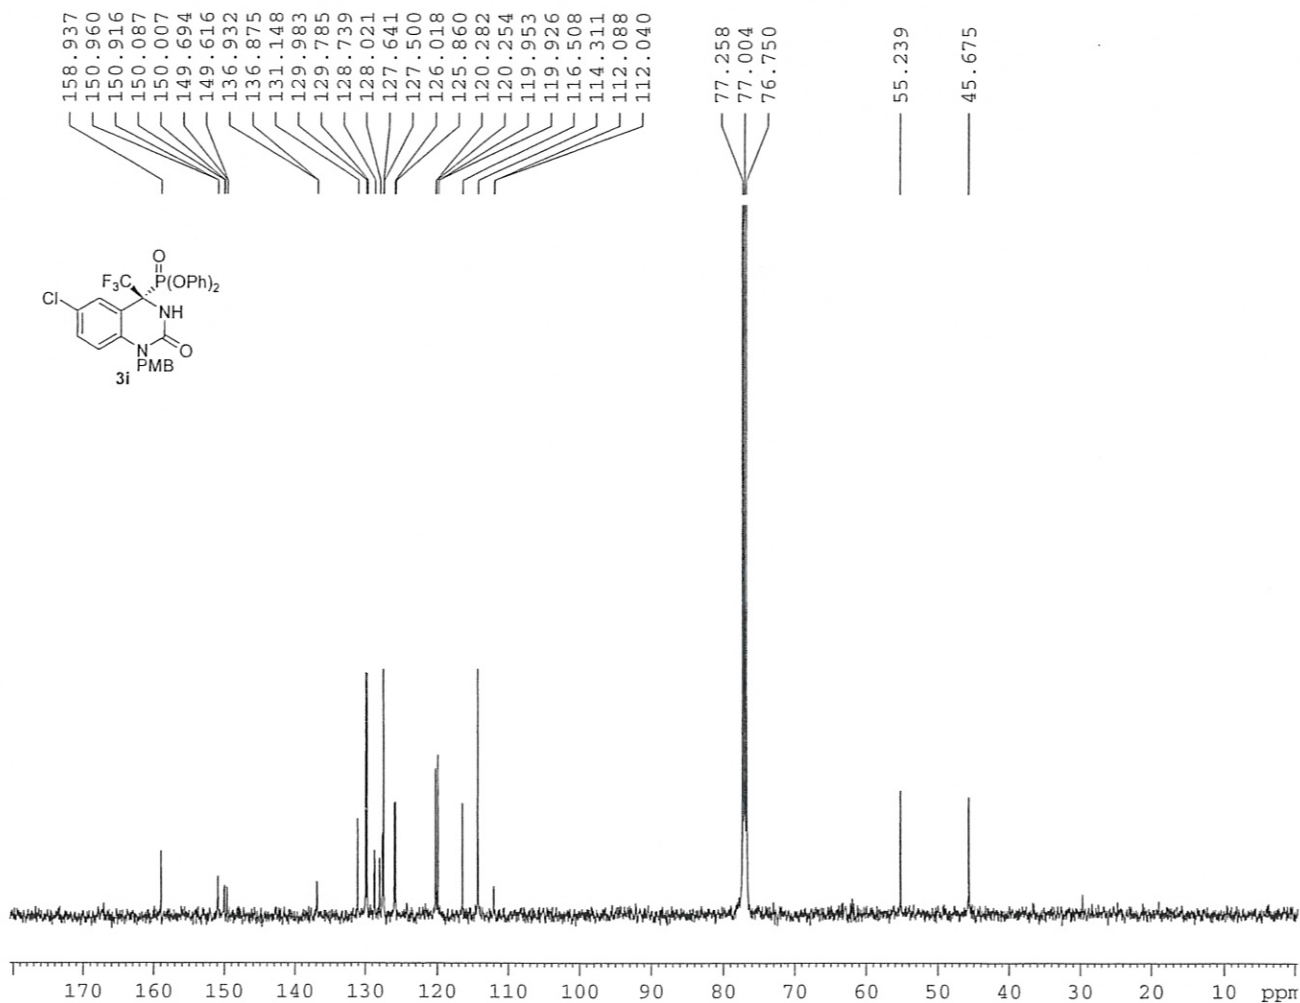

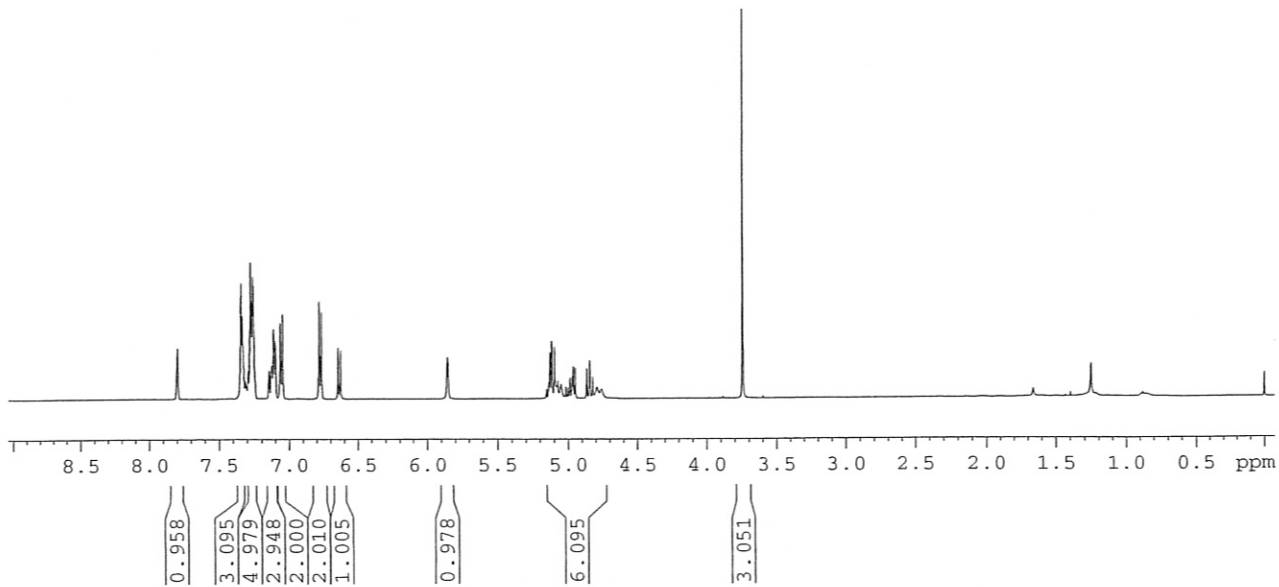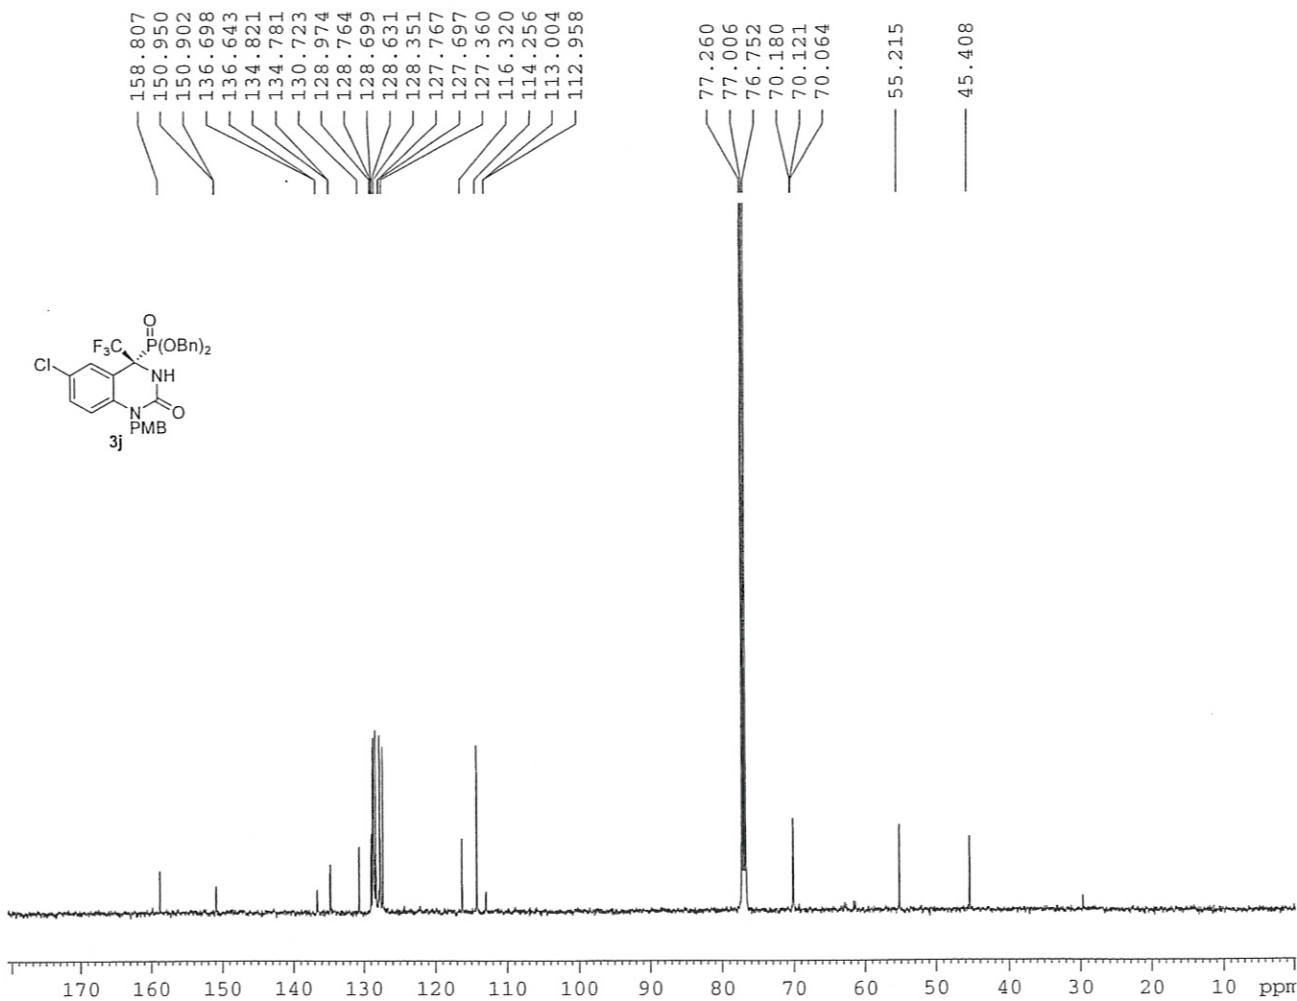

University Of New Mexico  
Department of Chemistry

Method Name: C:\EzStart\Projects\WeiWang\zsls134.met  
Data File: C:\EzStart\Projects\WeiWang\zsls-20-9-2.dat  
Date Acquired: 11/27/2007 11:22:02 PM Date Printed: 06/14/2008 03:43:44 PM  
Sample ID: 0

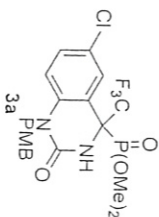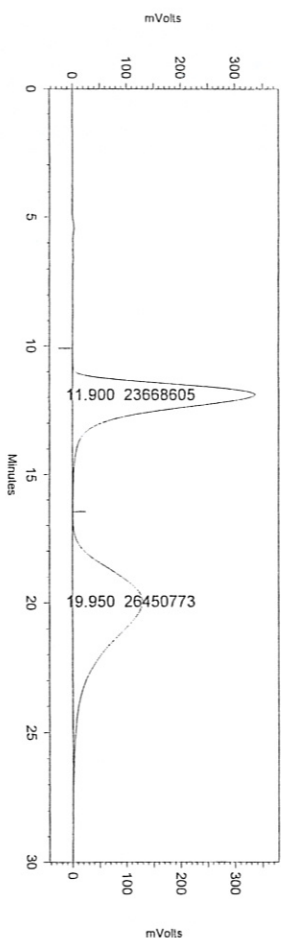

| SPD-10AVP<br>Ch1-254nm Results |        |          |         |
|--------------------------------|--------|----------|---------|
| PK #                           | RT     | Area     | Area %  |
| 1                              | 11.900 | 23668605 | 47.224  |
| 2                              | 19.950 | 26450773 | 52.776  |
| Totals                         |        | 50119378 | 100.000 |

University Of New Mexico  
Department of Chemistry

Method Name: C:\EZStart\Projects\WeiWang\gjjhg.met  
Data File: C:\EZStart\Projects\WeiWang\xyx-20-58-1.dat  
Date Acquired: 12/20/2007 1:53:12 PM Date Printed: 06/14/2008 03:45:51 PM  
Sample ID: 0

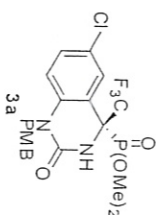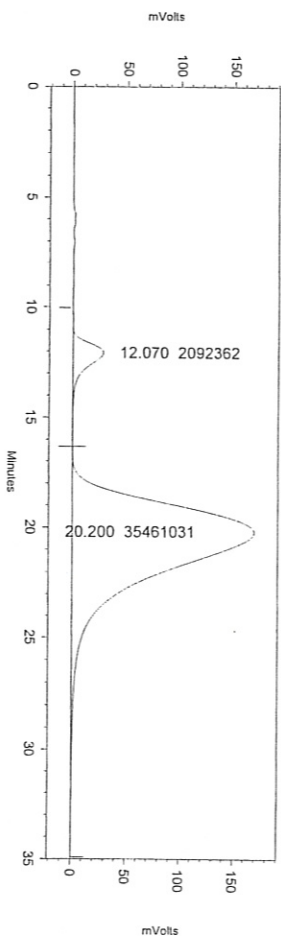

| SPD-10AVP<br>Ch1.254nm Results |        |          |         |
|--------------------------------|--------|----------|---------|
| PK #                           | RT     | Area     | Area %  |
| 1                              | 12.070 | 2092362  | 5.572   |
| 2                              | 20.200 | 35461031 | 94.428  |
| Totals                         |        | 37553393 | 100.000 |

University of New Mexico  
Department of Chemistry

Method Name: C:\EZStart\Projects\Default\Method\z1s1680.met  
Data File: C:\EZStart\Projects\Default\Data\kxh-21-68-1.dat  
Date Acquired: 6/14/2008 8:21:03 PM  
Date Printed: 6/14/2008 8:21:15 PM  
Sample ID:

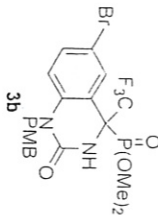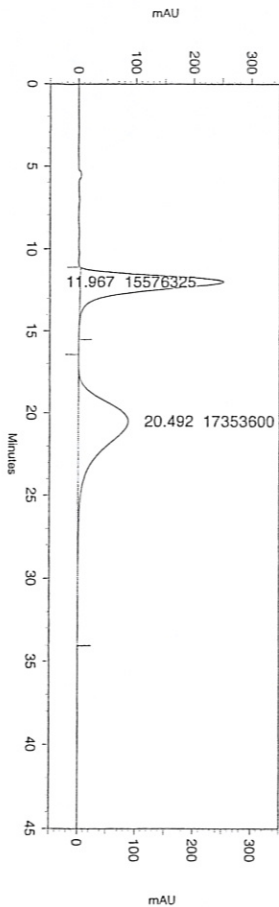

| SPD-20A<br>Ch1-254nm Results |                |          |              |
|------------------------------|----------------|----------|--------------|
| PK #                         | Retention Time | Area     | Area Percent |
| 1                            | 11.967         | 15576325 | 47.301       |
| 2                            | 20.492         | 17353600 | 52.699       |
| Totals                       |                | 32929925 | 100.000      |

University of New Mexico  
Department of Chemistry

Method Name: C:\EZStart\Projects\Default\Method\z1s1680.met  
Data File: C:\EZStart\Projects\Default\Data\kxh-21-69-1.dat  
Date Acquired: 6/14/2008 8:26:05 PM  
Date Printed: 6/14/2008 8:26:26 PM  
Sample ID:

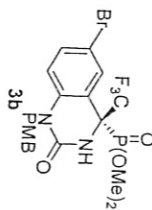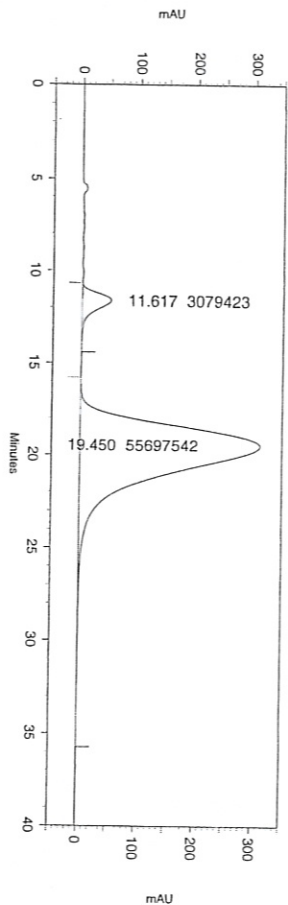

| SPD-20A<br>Ch1-254nm Results |                |          |              |
|------------------------------|----------------|----------|--------------|
| PK #                         | Retention Time | Area     | Area Percent |
| 1                            | 11.617         | 3079423  | 5.239        |
| 2                            | 19.450         | 55697542 | 94.761       |
| Totals                       |                | 58776965 | 100.000      |

University of New Mexico  
Department of Chemistry

Method Name: C:\EZStart\Projects\WeiWang\aqeeq.met  
Data File: C:\EZStart\Projects\WeiWang\hx-21-33-1.dat  
Date Acquired: 2/1/2008 1:27:40 PM Date Printed: 06/14/2008 03:57:44 PM  
Sample ID:

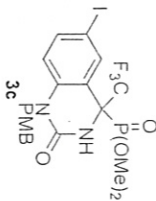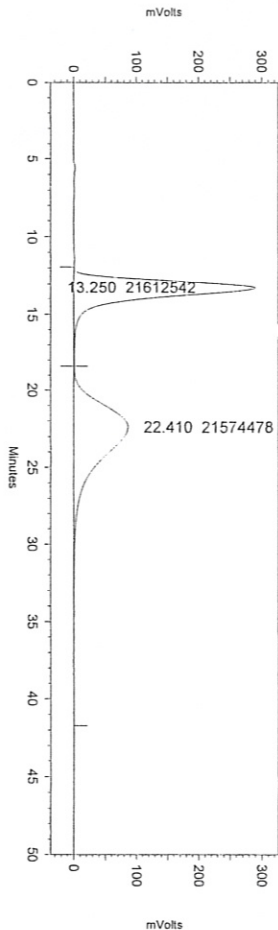

SPD-10AVP  
Ch1-254nm Results

| PK #   | RT     | Area     | Area %  |
|--------|--------|----------|---------|
| 1      | 13.250 | 21612542 | 50.044  |
| 2      | 22.410 | 21574478 | 49.956  |
| Totals |        | 43187020 | 100.000 |

University of New Mexico  
Department of Chemistry

Method Name: C:\EZStart\Projects\Default\Method\z1s1680.met  
Data File: C:\EZStart\Projects\Default\Data\hx-21-61-1.dat  
Date Acquired: 6/14/2008 8:14:15 PM  
Date Printed: 6/14/2008 8:14:38 PM  
Sample ID:

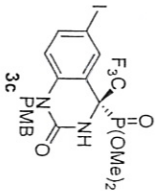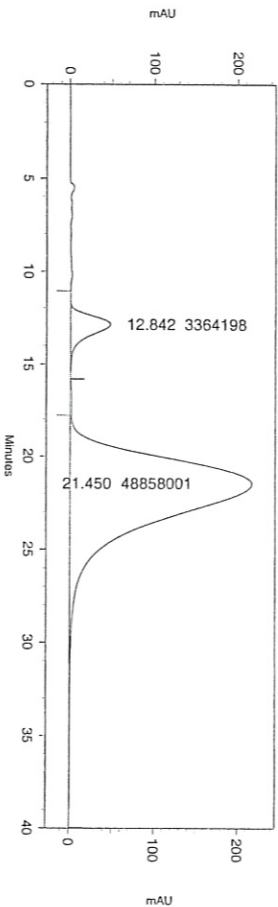

SPD-20A  
Ch1-254nm Results

| PK #   | Retention Time | Area     | Area Percent |
|--------|----------------|----------|--------------|
| 1      | 12.842         | 3364198  | 6.442        |
| 2      | 21.450         | 48858001 | 93.558       |
| Totals |                | 52222199 | 100.000      |

University of New Mexico  
Department of Chemistry

Method Name: C:\EZStart\Projects\Default\Method\z1s1680.met  
Data File: C:\EZStart\Projects\Default\Data\khr-21-56-1.dat  
Date Acquired: 6/14/2008 8:07:50 PM  
Date Printed: 6/14/2008 8:08:12 PM  
Sample ID:

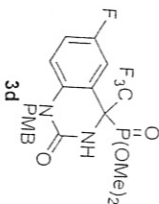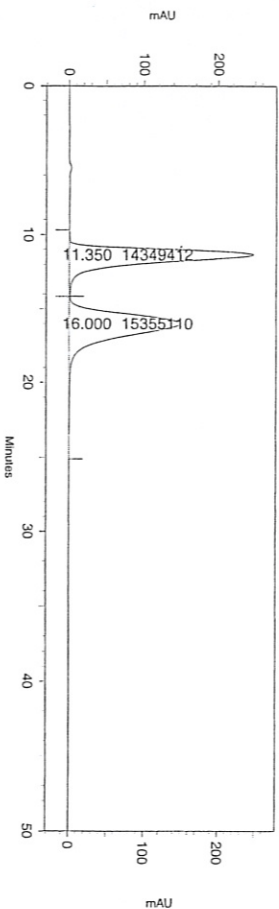

SPD-20A  
Ch1-254nm Results

| PK #   | Retention Time | Area     | Area Percent |
|--------|----------------|----------|--------------|
| 1      | 11.350         | 14349412 | 48.307       |
| 2      | 16.000         | 15355110 | 51.693       |
| Totals |                | 29704522 | 100.000      |

University of New Mexico  
Department of Chemistry

Method Name: C:\EZStart\Projects\Default\Method\z1s1680.met  
Data File: C:\EZStart\Projects\Default\Data\khr-21-59-1.dat  
Date Acquired: 6/14/2008 8:11:41 PM  
Date Printed: 6/14/2008 8:12:04 PM  
Sample ID:

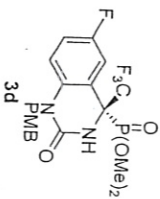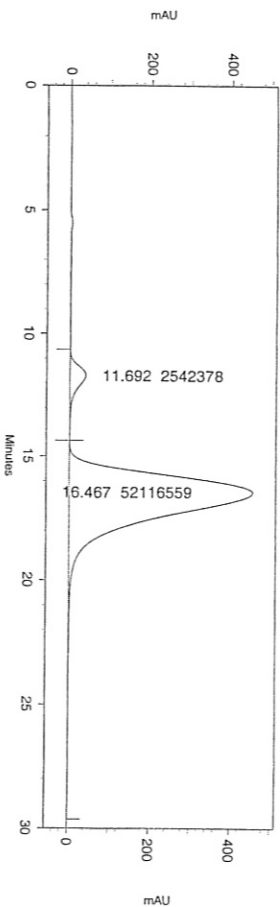

SPD-20A  
Ch1-254nm Results

| PK #   | Retention Time | Area     | Area Percent |
|--------|----------------|----------|--------------|
| 1      | 11.692         | 2542378  | 4.651        |
| 2      | 16.467         | 52116559 | 95.349       |
| Totals |                | 54658937 | 100.000      |

University Of New Mexico  
Department of Chemistry

Method Name: C:\EZStart\Projects\WeiWang\22w.met  
Data File: C:\EZStart\Projects\WeiWang\21-45-2.dat  
Date Acquired: 2/8/2008 10:46:46 AM Date Printed: 06/14/2008 04:01:12 PM  
Sample ID:

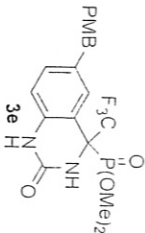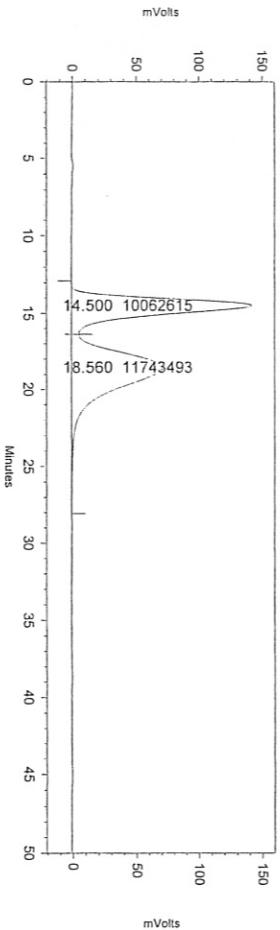

SPD-10AVP  
Ch1-254nm Results

| PK #   | RT     | Area     | Area %  |
|--------|--------|----------|---------|
| 1      | 14.500 | 10062615 | 46.146  |
| 2      | 18.560 | 11743493 | 53.854  |
| Totals |        | 21806108 | 100.000 |

University Of New Mexico  
Department of Chemistry

Method Name: C:\EZStart\Projects\WeiWang\22w.met  
Data File: C:\EZStart\Projects\WeiWang\21-45-2.dat  
Date Acquired: 3/9/2008 4:43:47 PM Date Printed: 06/14/2008 04:12:13 PM  
Sample ID:

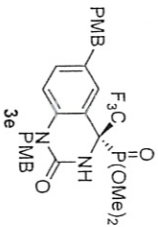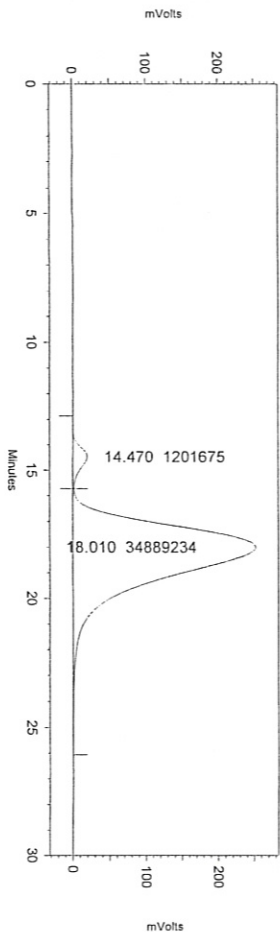

SPD-10AVP  
Ch1-254nm Results

| PK #   | RT     | Area     | Area %  |
|--------|--------|----------|---------|
| 1      | 14.470 | 1201675  | 3.330   |
| 2      | 18.010 | 34889234 | 96.670  |
| Totals |        | 36090909 | 100.000 |

University of New Mexico  
Department of Chemistry

Method Name: C:\EZStart\Projects\WeiWang\ageeg.met  
Data File: C:\EZStart\Projects\WeiWang\hx-21-34-1.dat  
Date Acquired: 2/1/2008 2:27:09 PM Date Printed: 06/14/2008 03:59:07 PM  
Sample ID:

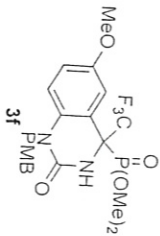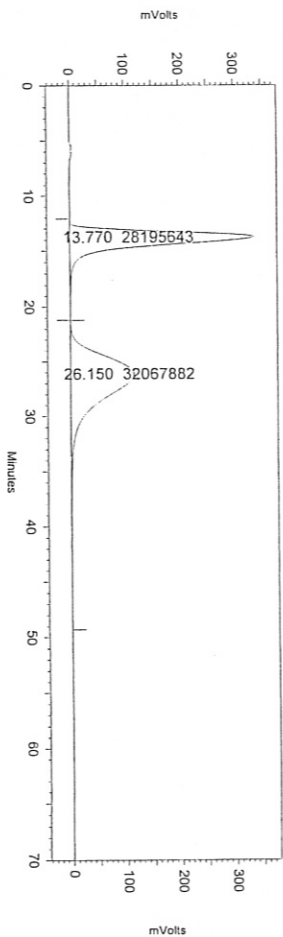

| SPD-10A VP<br>Ch1-254nm Results |        |          |         |  |
|---------------------------------|--------|----------|---------|--|
| PK #                            | RT     | Area     | Area %  |  |
| 1                               | 13.770 | 28195643 | 46.787  |  |
| 2                               | 26.150 | 32067882 | 53.213  |  |
| Totals                          |        | 60263525 | 100.000 |  |

University of New Mexico  
Department of Chemistry

Method Name: C:\EZStart\Projects\Default\Method\z1s1680.met  
Data File: C:\EZStart\Projects\Default\Data\hx-21-52-1.dat  
Date Acquired: 6/14/2008 8:04:52 PM  
Date Printed: 6/14/2008 8:06:04 PM  
Sample ID:

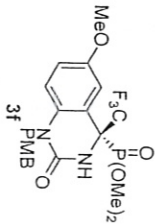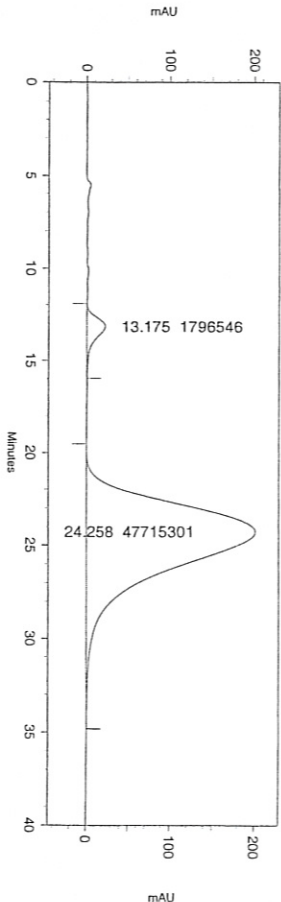

| SPD-20A<br>Ch1-254nm Results |                |          |              |  |
|------------------------------|----------------|----------|--------------|--|
| PK #                         | Retention Time | Area     | Area Percent |  |
| 1                            | 13.175         | 1796546  | 3.629        |  |
| 2                            | 24.258         | 47715301 | 96.371       |  |
| Totals                       |                | 49511847 | 100.000      |  |

University of New Mexico  
Department of Chemistry

Method Name: C:\EZStart\Projects\Default\Method\zls1680.met  
Data File: C:\EZStart\Projects\Default\Data\kxh-21-57-1.dat  
Date Acquired: 6/14/2008 8:09:14 PM  
Date Printed: 6/14/2008 8:09:36 PM  
Sample ID:

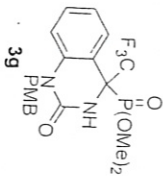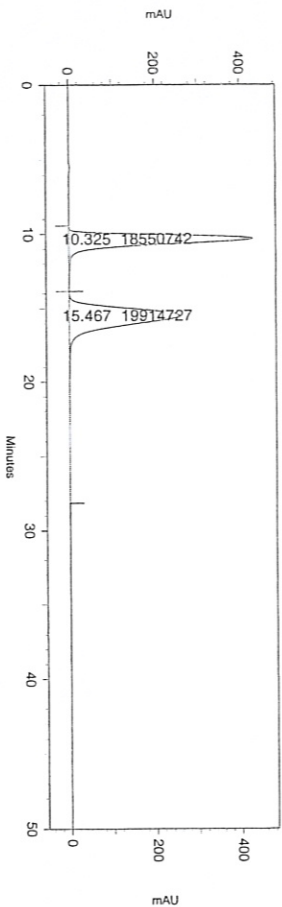

| SPD-20A<br>Ch1-254nm Results |                |          |              |  |
|------------------------------|----------------|----------|--------------|--|
| PK #                         | Retention Time | Area     | Area Percent |  |
| 1                            | 10.325         | 18550742 | 48.227       |  |
| 2                            | 15.467         | 19914727 | 51.773       |  |
| Totals                       |                | 38465469 | 100.000      |  |

University of New Mexico  
Department of Chemistry

Method Name: C:\EZStart\Projects\Default\Method\zls1680.met  
Data File: C:\EZStart\Projects\Default\Data\kxh-21-58-1.dat  
Date Acquired: 6/14/2008 8:10:51 PM  
Date Printed: 6/14/2008 8:11:08 PM  
Sample ID:

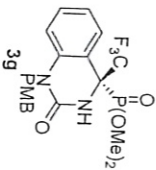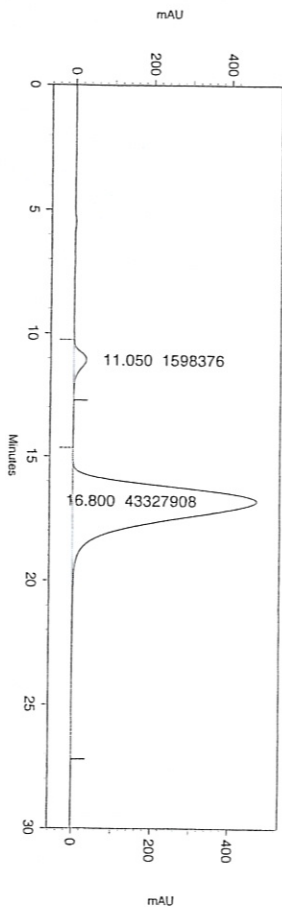

| SPD-20A<br>Ch1-254nm Results |                |          |              |  |
|------------------------------|----------------|----------|--------------|--|
| PK #                         | Retention Time | Area     | Area Percent |  |
| 1                            | 11.050         | 1598376  | 3.558        |  |
| 2                            | 16.800         | 43327908 | 96.442       |  |
| Totals                       |                | 44926284 | 100.000      |  |

University of New Mexico  
Department of Chemistry

Method Name: C:\EZStart\Projects\WeiWang\zls1560.met  
Data File: C:\EZStart\Projects\WeiWang\zhx-16-80-2-2.dat  
Date Acquired: 12/19/2007 11:46:03 AM Date Printed: 06/14/2008 03:40:22 PM  
Sample ID:

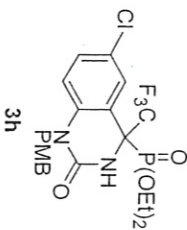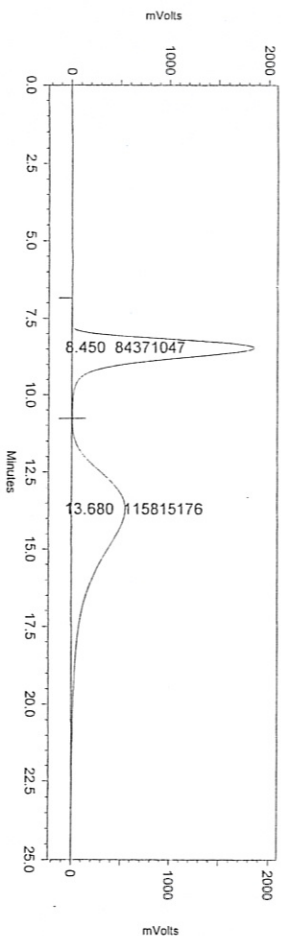

SPD-10Avp  
Ch1-254nm Results

| PK #   | RT     | Area      | Area %  |
|--------|--------|-----------|---------|
| 1      | 8.450  | 84371047  | 42.146  |
| 2      | 13.680 | 115815176 | 57.854  |
| Totals |        | 200186223 | 100.000 |

University of New Mexico  
Department of Chemistry

Method Name: C:\EZStart\Projects\WeiWang\gjhg.met  
Data File: C:\EZStart\Projects\WeiWang\zhx-20-65-1.dat  
Date Acquired: 12/24/2007 12:01:16 AM Date Printed: 06/14/2008 03:47:10 PM  
Sample ID:

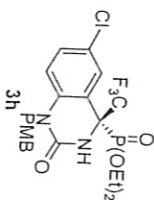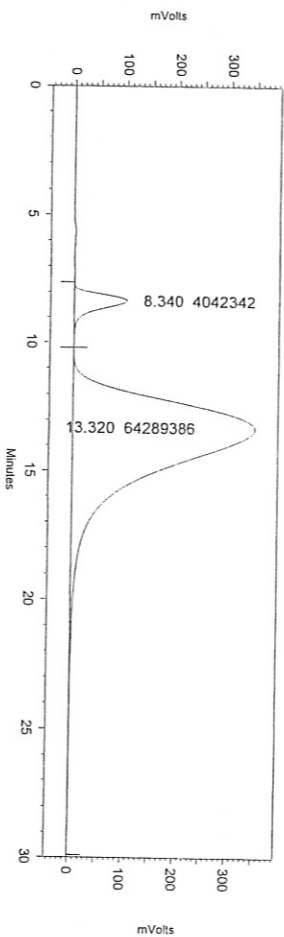

SPD-10Avp  
Ch1-254nm Results

| PK #   | RT     | Area     | Area %  |
|--------|--------|----------|---------|
| 1      | 8.340  | 4042342  | 5.916   |
| 2      | 13.320 | 64289386 | 94.084  |
| Totals |        | 68331728 | 100.000 |

University of New Mexico  
Department of Chemistry

Method Name: C:\EZStart\Projects\WeiWang\aa01.met  
Data File: C:\EZStart\Projects\WeiWang\hx-20-70-1.dat  
Date Acquired: 12/31/2007 11:11:50 PM Date Printed: 06/14/2008 03:50:38 PM  
Sample ID:

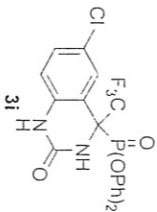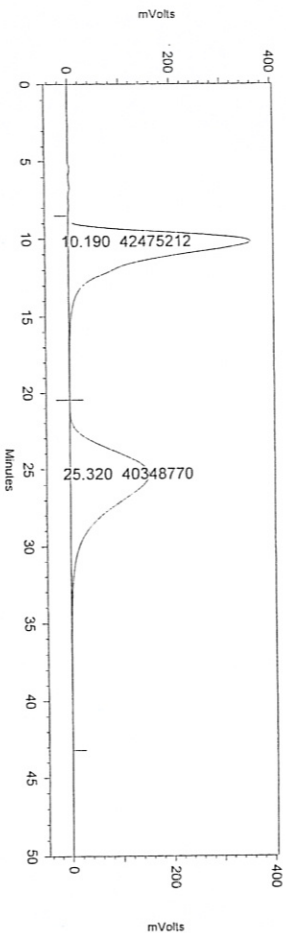

University of New Mexico  
Department of Chemistry

Method Name: C:\EZStart\Projects\WeiWang\aa004.met  
Data File: C:\EZStart\Projects\WeiWang\hx-20-93-1.dat  
Date Acquired: 1/14/2008 9:10:04 PM Date Printed: 06/14/2008 07:39:47 PM  
Sample ID:

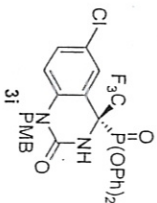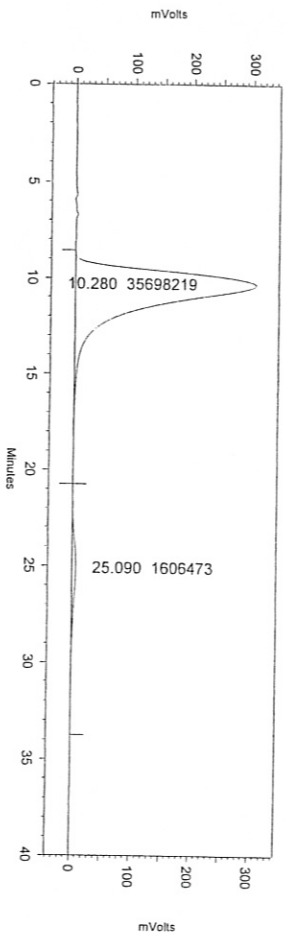

University Of New Mexico  
Department of Chemistry

Method Name: C:\EzStart\Projects\WeiWang\gjhg.met  
Data File: C:\EzStart\Projects\WeiWang\hix-20-66-3 OD-H.dat  
Date Acquired: 12/26/2007 12:21:04 PM Date Printed: 06/14/2008 03:52:30 PM  
Sample ID:

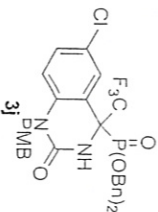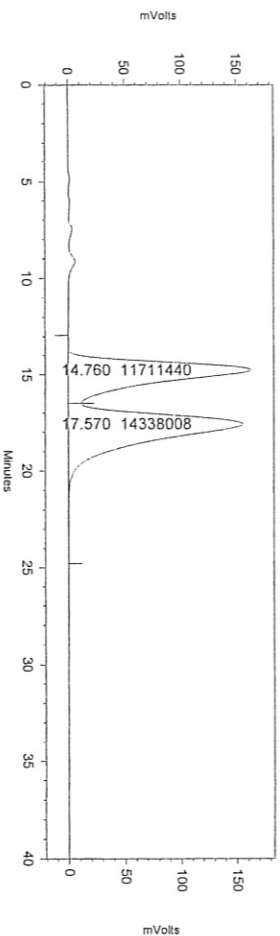

University Of New Mexico  
Department of Chemistry

Method Name: C:\EzStart\Projects\WeiWang\aa0004.met  
Data File: C:\EzStart\Projects\WeiWang\hix-20-92-1.dat  
Date Acquired: 1/14/2008 10:32:34 PM Date Printed: 06/14/2008 03:54:48 PM  
Sample ID:

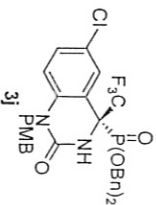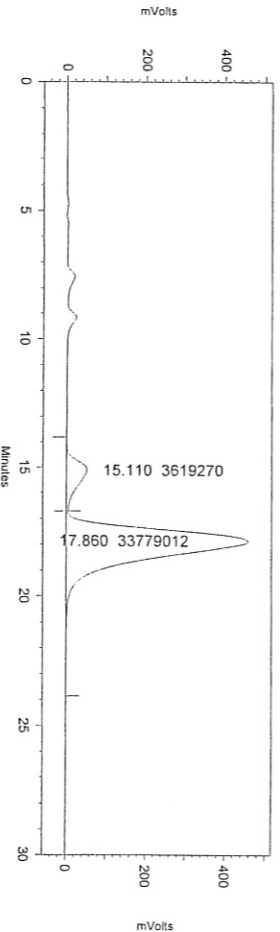

Supplement: c2cc38097h.pdf [file c2cc38097h.pdf]
